# Supplementary material for: Oxidative coupling of 1-(2-methyl-4-phenylquinolin-3-yl)ethanone with ethanol and unexpected deacetylative synthesis of 3-hydroxy quinoline
Source: Royal Society of Chemistry journal article supplement (doi:10.1039/c6ob02336c), 2016-12-17
Supplement: c6ob02336c1.pdf [file c6ob02336c1.pdf]

## **Oxidative coupling of 1-(2-methyl-4-phenylquinolin-3-yl)ethanone with ethanol and unexpected deacetylative synthesis of 3-hydroxy quinoline**

Parul Chauhan,<sup>a</sup> Makthala Ravi,<sup>a</sup> Ruchir Kant,<sup>b</sup> Prem. P. Yadav<sup>\*a</sup>

<sup>a</sup>*Divisions of Medicinal and Process Chemistry, CSIR-Central Drug Research Institute, Lucknow- 226001, India.*

<sup>b</sup>*Division of Molecular and Structural Biology, CSIR-Central Drug Research Institute, Lucknow-226031, India.*

| <b>Contents:</b>                                              | <b>Page No.</b> |
|---------------------------------------------------------------|-----------------|
| <b>General Details</b>                                        | <b>2</b>        |
| <b>Compound Characterization Data</b>                         | <b>3-16</b>     |
| <b>X-Ray crystal structure information of compound 2a</b>     | <b>17-18</b>    |
| <b>Copies of <sup>1</sup>H and <sup>13</sup>C NMR spectra</b> | <b>19-45</b>    |

## General Experimental Details:

$^1\text{H}$  NMR and  $^{13}\text{C}$  NMR spectra were recorded on Bruker Avance-400 using  $\text{CDCl}_3$  and DMSO- $d_6$  as solvent and tetramethylsilane as internal reference. Splitting patterns are described as singlet (s), doublet (d), triplet (t), multiplet (m) and broad (br). IR spectra were recorded on a FT-IR spectrophotometer and melting points were determined on melting point apparatus and are uncorrected.. Electrospray ionization mass spectrometry (ESI-MS) was obtained on Thermo LCQ Advantage Max Spectrometer and HRMS was recorded on Agilent 6520 Q-TOF. Reactions were monitored on silica gel TLC plates (coated with TLC grade silica gel, obtained from Merck). All glass apparatus were oven dried prior to use. Column chromatography was performed over silica gel (230-400 Mesh) by using Smart flash EPCLC AI-700X YAMAZEN with minimal amount of solvent. All chemicals and reagents were obtained from Aldrich (USA) and Alfa Aesar (England) and were used without further purification.

### General procedure for the synthesis of product 2:

Take solution of 1-(2-methyl-4-phenylquinolin-3-yl)ethanone **1** (1.0 mmol), N-bromosuccinimide (1.5 mmol), tert-butyl hydroperoxide (5 mmol) and potassium carbonate (3.0 mmol) in ethanol (20 mL) was stirred at room temperature for 24 hours. Next, the ethanol was removed under reduced pressure and the crude of reaction was diluted with water (80 mL). The aqueous layer was extracted with ethylacetate (3×20 mL) three times. The organic layer was further dried over sodium sulphate (anhydrous) and removed under reduced pressure to give crude product, which further purified by column chromatography over silica gel afforded the desired product **2a-2r**.

### General procedure for the synthesis of product 5:

Take solution of 1-(2-methyl-4-phenylquinolin-3-yl)ethanone **1** (1.0 mmol), N-bromosuccinimide (1.5 mmol) and potassium carbonate (3.0 mmol) in methanol (20 mL) was stirred at room temperature for 6 hours. Next, the methanol was removed under reduced pressure and the crude of reaction was diluted with water (80 mL). The aqueous layer was extracted with ethylacetate (3×20 mL) three times. The organic layer was further dried over sodium sulphate (anhydrous) and removed under reduced pressure to give crude product, which further purified by column chromatography over silica gel afforded the desired product **5a-5h**.

## Compound Characterization Data:

### (2-methyl-4-phenylquinolin-3-yl)(3-methyloxiran-2-yl)methanone (2a):

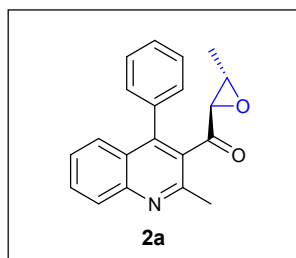

Yield 78% as white solid: mp 100-102°C; FT-IR (KBr,  $\text{cm}^{-1}$ ) 3019, 1635, 1215, 1069;  $^1\text{H}$  NMR (400 MHz,  $\text{CDCl}_3$ )  $\delta$  1.06 (d,  $J = 5.12$  Hz, 3H), 2.70-2.77 (m, 4H), 3.07 (d,  $J = 1.80$  Hz, 1H), 7.32-7.34 (m, 1H), 7.47-7.52 (m, 2H), 7.53-7.59 (m, 3H), 7.65-7.68 (dd,  $J = 8.4, 0.8$  Hz, 1H), 7.75-7.79 (m, 1H), 8.12 (d,  $J = 8.4$  Hz, 1H);  $^{13}\text{C}$  NMR (100 MHz,  $\text{DMSO}-d_6$ )  $\delta$  17.57 ( $\text{CH}_3$ ), 23.98 ( $\text{CH}_3$ ), 56.89 (CH), 60.21 (CH), 124.81 (C), 126.19 (CH), 127.49 (CH), 128.99 (CH), 129.12 (CH), 129.17 (CH), 129.57 (CH), 130.46 (CH), 130.69 (CH), 131.15 (CH), 131.72 (C), 134.74 (C), 145.69 (C), 147.70 (C), 154.16 (C) 203.26 (C); ESI-MS ( $m/z$ ) 304 ( $\text{M}+\text{H}$ ) $^+$ ; HRMS (ESI) calculated for  $\text{C}_{20}\text{H}_{18}\text{NO}_2$  ( $\text{M} + \text{H}$ ) $^+$  304.1338, found 304.1330.

### (7-chloro-2-methyl-4-phenylquinolin-3-yl)(3-methyloxiran-2-yl)methanone (2b):

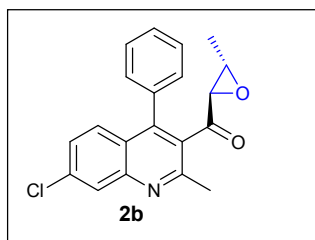

Yield 63% as white solid: mp 114-116°C; FT-IR (KBr,  $\text{cm}^{-1}$ ) 3019, 1644, 1215, 1069;  $^1\text{H}$  NMR (400 MHz,  $\text{DMSO}-d_6$ )  $\delta$  0.97 (d,  $J = 5.04$  Hz, 3H), 2.60-2.65 (m, 4H), 3.41 (d,  $J = 1.80$  Hz, 1H), 7.29-7.32 (m, 1H), 7.42-7.44 (m, 1H), 7.51-7.62 (m, 5H), 8.10 (d,  $J = 2.04$  Hz, 1H);  $^{13}\text{C}$  NMR (100 MHz,  $\text{DMSO}-d_6$ )  $\delta$  17.55 ( $\text{CH}_3$ ), 24.02 ( $\text{CH}_3$ ), 56.94 (CH), 60.15 (CH), 123.59 (C), 127.72 (CH), 128.09 (CH), 128.31 (CH), 129.09 (CH), 129.26 (CH), 129.78 (CH), 130.42 (CH), 130.64 (CH), 131.97 (C), 134.24 (C), 135.86 (C), 145.85 (C), 148.08 (C), 155.87 (C) 202.96 (C); ESI-MS ( $m/z$ ) 338 ( $\text{M}+\text{H}$ ) $^+$ ; HRMS (ESI) calculated for  $\text{C}_{20}\text{H}_{17}\text{ClNO}_2$  ( $\text{M} + \text{H}$ ) $^+$  338.0948, found 338.0933.

**(6-chloro-2-methyl-4-phenylquinolin-3-yl)(3-methyloxiran-2-yl)methanone (2c):**

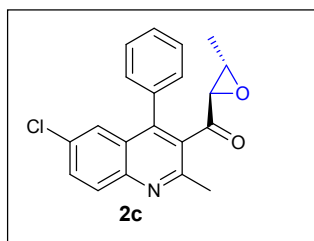

Yield 72% as white solid: mp 142-143°C; FT-IR (KBr,  $\text{cm}^{-1}$ ) 3019, 1636, 1215, 1068;  $^1\text{H}$  NMR (400 MHz,  $\text{DMSO-}d_6$ )  $\delta$  0.99 (d,  $J = 5.04$  Hz, 3H), 2.60 (s, 3H), 2.63-2.66 (m, 1H), 3.43 (d,  $J = 1.84$  Hz, 1H), 7.31-7.33 (m, 1H), 7.42-7.46 (m, 2H), 7.56-7.64 (m, 3H), 7.84-7.87 (dd,  $J = 8.96, 2.4$  Hz, 1H), 8.08 (d,  $J = 8.96$  Hz, 1H);  $^{13}\text{C}$  NMR (100 MHz,  $\text{DMSO-}d_6$ )  $\delta$  17.57 ( $\text{CH}_3$ ), 23.97 ( $\text{CH}_3$ ), 56.97 (CH), 60.12 (CH), 124.72 (CH), 125.79 (C), 129.20 (CH), 129.36 (CH), 129.89 (CH), 130.42 (CH), 130.62 (CH), 131.41 (CH), 131.66 (CH), 131.97 (C), 132.49 (C), 134.01 (C), 144.98 (C), 146.14 (C), 154.98 (C), 203.01 (C); ESI-MS ( $m/z$ ) 338 ( $\text{M}+\text{H}$ ) $^+$ ; HRMS (ESI) calculated for  $\text{C}_{20}\text{H}_{17}\text{ClNO}_2$  ( $\text{M} + \text{H}$ ) $^+$  338.0948, found 338.0947.

**(5-fluoro-2-methyl-4-phenylquinolin-3-yl)(3-methyloxiran-2-yl)methanone (2d):**

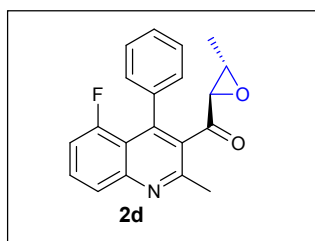

Yield 70% as white solid: mp 75-78°C; FT-IR (KBr,  $\text{cm}^{-1}$ ) 3019, 1637, 1215, 1069;  $^1\text{H}$  NMR (400 MHz,  $\text{DMSO-}d_6$ )  $\delta$  1.02 (d,  $J = 5.04$  Hz, 3H), 2.54-2.56 (m, 1H), 2.58 (s, 3H), 3.44 (d,  $J = 1.64$  Hz, 1H), 7.28-7.34 (m, 2H), 7.40 (brd, 1H), 7.43-7.49 (m, 3H), 7.79-7.84 (m, 1H), 7.92 (d,  $J = 8.36$  Hz, 1H);  $^{13}\text{C}$  NMR (100 MHz,  $\text{DMSO-}d_6$ )  $\delta$  17.59 ( $\text{CH}_3$ ), 23.83 ( $\text{CH}_3$ ), 56.91 (CH), 60.07 (CH), 112.85 (d,  $J = 21.32$  Hz, CH), 115.30 (C), 125.67 (CH), 128.19 (2 $\times$ CH), 128.98 (CH), 129.43 (CH), 129.68 (CH), 131.32 (d,  $J = 9.62$  Hz, CH), 133.79 (C), 136.85 (C), 142.70 (C), 148.97 (C), 154.85 (C), 159.76 (d,  $J = 256.54$  Hz, C-F), 203.07 (C); ESI-MS ( $m/z$ ) 322 ( $\text{M}+\text{H}$ ) $^+$ ; HRMS (ESI) calculated for  $\text{C}_{20}\text{H}_{17}\text{FNO}_2$  ( $\text{M}+\text{H}$ ) $^+$  322.1243, found 322.1239.

**(6-chloro-4-(2-chlorophenyl)-2-methylquinolin-3-yl)(3-methyloxiran-2-yl)methanone (2e):**

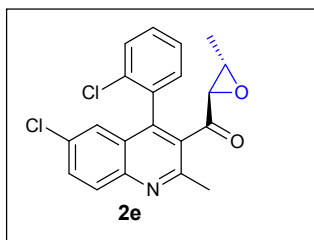

Yield 66% as white solid: mp 162-164°C; FT-IR (KBr,  $\text{cm}^{-1}$ ) 3019, 1637, 1215, 1071;  $^1\text{H}$ NMR (400 MHz,  $\text{DMSO}-d_6$ )  $\delta$  1.12 (d,  $J = 5.04$  Hz, 3H), 2.66 (s, 3H), 2.73-2.77 (m, 1H), 3.62 (d,  $J = 1.72$  Hz, 1H), 7.16 (d,  $J = 2.28$  Hz, 1H), 7.49-7.52 (dd,  $J = 7.52, 1.80$  Hz, 1H), 7.57-7.66 (m, 2H), 7.71-7.73 (dd,  $J = 7.8, 1.08$  Hz, 1H), 7.87-7.89 (dd,  $J = 8.96, 2.32$  Hz, 1H), 8.12 (d,  $J = 8.96$  Hz, 1H);  $^{13}\text{C}$  NMR (100 MHz,  $\text{DMSO}-d_6$ )  $\delta$  17.59 ( $\text{CH}_3$ ), 24.06 ( $\text{CH}_3$ ), 57.21 (CH), 59.80 (CH), 124.30 (CH), 125.46 (C), 128.05 (CH), 130.35 (CH), 131.54 (CH), 131.95 (CH), 132.06 (CH), 132.33 (C), 132.54 (CH), 132.68 (C), 132.83 (C), 133.21 (C), 142.10 (C), 146.03 (C), 155.25 (C) 201.76 (C); ESI-MS ( $m/z$ ) 372 ( $\text{M}+\text{H}$ ) $^+$ ; HRMS (ESI) calculated for  $\text{C}_{20}\text{H}_{16}\text{Cl}_2\text{NO}_2$  ( $\text{M}+\text{H}$ ) $^+$  372.0558, found 372.0551..

**(8-bromo-6-chloro-2-methyl-4-phenylquinolin-3-yl)(3-methyloxiran-2-yl)methanone (2f):**

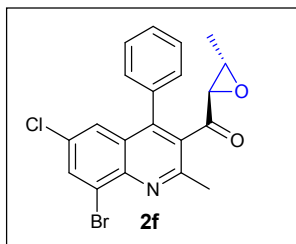

Yield 64% as light yellow solid: mp 142-144°C; FT-IR (KBr,  $\text{cm}^{-1}$ ) 3019, 1637, 1215, 1069;  $^1\text{H}$ NMR (400 MHz,  $\text{DMSO}-d_6$ )  $\delta$  1.00 (d,  $J = 5.04$  Hz, 3H), 2.63-2.65 (m, 4H), 3.44 (d,  $J = 1.8$  Hz, 1H), 7.31-7.33 (m, 1H), 7.41-7.45 (m, 2H), 7.56-7.64 (m, 3H), 8.33 (d,  $J = 2.24$  Hz, 1H);  $^{13}\text{C}$  NMR (100 MHz,  $\text{DMSO}-d_6$ )  $\delta$  17.55 ( $\text{CH}_3$ ), 24.25 ( $\text{CH}_3$ ), 56.99 (CH), 60.07 (CH), 124.91 (CH), 125.91 (C), 126.77 (C), 129.20 (CH), 129.35 (CH), 130.04 (CH), 130.43 (CH), 130.67 (CH), 131.68 (C), 133.26 (C), 133.69 (C), 134.32 (CH), 143.08 (C), 145.74 (C), 156.00 (C) 202.66 (C); ESI-MS ( $m/z$ ) 416 ( $\text{M}+\text{H}$ ) $^+$ ; HRMS (ESI) calculated for  $\text{C}_{20}\text{H}_{16}\text{BrClINO}_2$  ( $\text{M}+\text{H}$ ) $^+$  416.0053, found 416.0057.

**(6,8-dibromo-2-methyl-4-phenylquinolin-3-yl)(3-methyloxiran-2-yl)methanone (2g):**

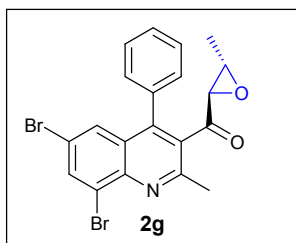

Yield 69% as light yellow solid: mp 141-143°C; FT-IR (KBr,  $\text{cm}^{-1}$ ) 3019, 1637, 1210, 1069;  $^1\text{H}$  NMR (400 MHz,  $\text{DMSO}-d_6$ )  $\delta$  1.01 (d,  $J = 4.88$  Hz, 3H), 2.66 (m, 4H), 3.46 (s, 1H), 7.34 (d,  $J = 5.44$  Hz, 1H), 7.46 (d,  $J = 6.68$  Hz, 1H), 7.58-7.62 (m, 4H), 8.42 (d,  $J = 1.64$  Hz, 1H);  $^{13}\text{C}$  NMR (100 MHz,  $\text{DMSO}-d_6$ )  $\delta$  17.52 ( $\text{CH}_3$ ), 24.26 ( $\text{CH}_3$ ), 57.04 (CH), 60.06 (CH), 119.93 (C), 125.92 (C), 127.32 (C), 128.14 (CH), 129.20 (CH), 129.35 (CH), 130.06 (CH), 130.40 (CH), 130.64 (CH), 133.23 (C), 133.65 (C), 136.62 (CH), 143.24 (C), 145.61 (C), 156.08 (C) 202.66 (C); ESI-MS ( $m/z$ ) 462 ( $\text{M}+\text{H}$ ) $^+$ ; HRMS (ESI) calculated for  $\text{C}_{20}\text{H}_{16}\text{Br}_2\text{NO}_2$  ( $\text{M}+\text{H}$ ) $^+$  461.9527, found 461.9526.

**(8-bromo-6-chloro-4-(2-chlorophenyl)-2-methylquinolin-3-yl)(3-methyloxiran-2-yl)methanone (2h):**

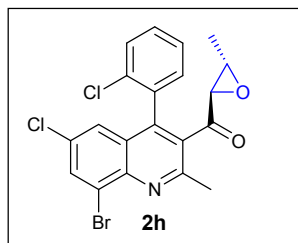

Yield 65% as light yellow solid: mp 138-140°C; FT-IR (KBr,  $\text{cm}^{-1}$ ) 3019, 1635, 1215, 1068;  $^1\text{H}$  NMR (400 MHz,  $\text{DMSO}-d_6$ )  $\delta$  1.12 (d,  $J = 5.04$  Hz, 3H), 2.69 (m, 3H), 2.73-2.77 (m, 1H), 3.63 (d,  $J = 1.6$  Hz, 1H), 7.17 (d,  $J = 2.16$  Hz, 1H), 7.49-7.51 (dd,  $J = 7.48, 1.64$  Hz, 1H), 7.57-7.66 (m, 2H), 7.70-7.72 (dd,  $J = 7.84, 0.92$  Hz, 1H), 8.35 (d,  $J = 2.16$  Hz, 1H);  $^{13}\text{C}$  NMR (100 MHz,  $\text{DMSO}-d_6$ )  $\delta$  17.57 ( $\text{CH}_3$ ), 24.35 ( $\text{CH}_3$ ), 57.25 (CH), 59.75 (CH), 124.42 (CH), 126.05 (C), 126.39 (C), 128.07 (CH), 130.37 (CH), 132.16 (C), 132.23 (CH), 132.34 (C), 132.55 (CH), 132.80 (C), 134.03 (C), 134.66 (CH), 142.83 (C), 143.01 (C), 156.32 (C) 201.45 (C); ESI-MS ( $m/z$ ) 450 ( $\text{M}+\text{H}$ ) $^+$ ; HRMS (ESI) calculated for  $\text{C}_{20}\text{H}_{15}\text{BrCl}_2\text{NO}_2$  ( $\text{M}+\text{H}$ ) $^+$  449.9663, found 449.9650.

**(4-(4-bromophenyl)-6-chloro-2-methylquinolin-3-yl)(3-methyloxiran-2-yl)methanone (2i):**

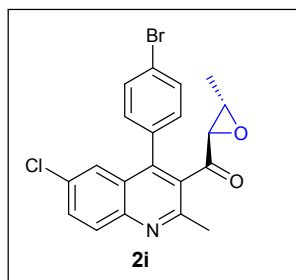

Yield 71% as light yellow solid: mp 140-142°C; FT-IR (KBr,  $\text{cm}^{-1}$ ) 3019, 1700, 1215, 1070;  $^1\text{H}$ NMR (400 MHz,  $\text{DMSO}-d_6$ )  $\delta$  1.06 (d,  $J = 5.04$  Hz, 3H), 2.61 (s, 3H), 2.75-2.79 (m, 1H), 3.47 (d,  $J = 1.84$  Hz, 1H), 7.28-7.31 (dd,  $J = 8.12, 2.16$  Hz, 1H), 7.40-7.44 (m, 2H), 7.78-7.89 (m, 3H), 8.09 (d,  $J = 8.92$  Hz, 1H);  $^{13}\text{C}$  NMR (100 MHz,  $\text{DMSO}-d_6$ )  $\delta$  17.44 ( $\text{CH}_3$ ), 23.96 ( $\text{CH}_3$ ), 56.98 (CH), 60.13 (CH), 123.60 (C), 124.60 (CH), 125.51 (C), 131.41 (CH), 131.80 (CH), 132.20 (C), 132.26 (C & CH), 132.35 (CH), 132.49 (CH), 132.82 (CH), 132.21 (C), 143.94 (C), 146.13 (C), 154.99 (C), 203.00 (C); ESI-MS ( $m/z$ ) 416 ( $\text{M}+\text{H}$ ) $^+$ ; HRMS (ESI) calculated for  $\text{C}_{20}\text{H}_{16}\text{BrClNO}_2$  ( $\text{M}+\text{H}$ ) $^+$  416.0053, found 416.0055.

**(4-(4-bromophenyl)-5-fluoro-2-methylquinolin-3-yl)(3-methyloxiran-2-yl)methanone (2j):**

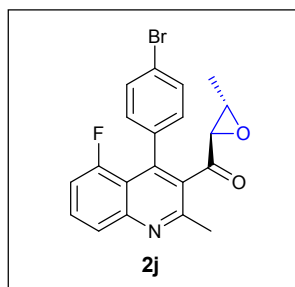

Yield 63% as light yellow solid: mp 102-104°C; FT-IR (KBr,  $\text{cm}^{-1}$ ) 3019, 1619, 1215, 1069;  $^1\text{H}$  NMR (400 MHz,  $\text{DMSO}-d_6$ )  $\delta$  1.09 (d,  $J = 5.04$  Hz, 3H), 2.59 (s, 3H), 2.69-2.73 (m, 1H), 3.48 (d,  $J = 1.76$  Hz, 1H), 7.27-7.29 (dd,  $J = 8.04, 2.08$  Hz, 1H), 7.32-7.38 (m, 2H), 7.66-7.72 (m, 2H), 7.81-7.86 (m, 1H), 7.93 (d,  $J = 7.84$  Hz, 1H);  $^{13}\text{C}$  NMR (100 MHz,  $\text{DMSO}-d_6$ )  $\delta$  17.47 ( $\text{CH}_3$ ), 23.85 ( $\text{CH}_3$ ), 57.02 (CH), 60.08 (CH), 112.96 (d,  $J = 21.27$  Hz, CH), 115.11 (d,  $J = 8.96$  Hz, C), 122.64 (CH), 125.76 (CH), 131.19 (2 $\times$ CH), 131.37 (C), 131.49 (CH), 131.95 (CH), 133.49 (C), 136.07 (C), 141.59 (C), 148.93 (CH), 154.94 (C), 159.65 (d,  $J = 255.95$ ).

Hz, C-F), 203.09 (C); ESI-MS ( $m/z$ ) 400 ( $M+H$ )<sup>+</sup>; HRMS (ESI) calculated for  $C_{20}H_{16}BrFNO_2$  ( $M + H$ )<sup>+</sup> 400.0348, found 400.0341.

**(5-fluoro-4-(4-fluorophenyl)-2-methylquinolin-3-yl)(3-methyloxiran-2-yl)methanone (2k):**

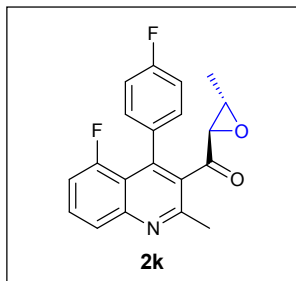

Yield 67% as white solid: mp 108-110°C; FT-IR (KBr,  $cm^{-1}$ ) 3019, 1637, 1216, 1069; <sup>1</sup>H NMR (400 MHz,  $CD_3OD$ )  $\delta$  1.14 (d,  $J$  = 5.08 Hz, 3H), 2.67 (s, 3H), 2.72-2.74 (m, 1H), 3.35 (d,  $J$  = 1.6 Hz, 1H), 7.21-7.29 (m, 3H), 7.32-7.36 (m, 1H), 7.47-7.51 (m, 1H), 7.79-7.84 (m, 1H), 7.94 (d,  $J$  = 8.48 Hz, 1H); <sup>13</sup>C NMR (100 MHz,  $CD_3OD$ )  $\delta$  16.11 ( $CH_3$ ), 22.10 ( $CH_3$ ), 56.61 (CH), 59.97 (CH), 112.23 (d,  $J$  = 21.85 Hz, CH), 114.55 (d,  $J$  = 21.87 Hz, CH), 114.69 (d,  $J$  = 21.95 Hz, CH), 115.38 (d,  $J$  = 9.3 Hz, C), 124.42 (d,  $J$  = 3.89 Hz, CH), 130.78 (d,  $J$  = 9.68 Hz, CH), 131.13-131.22 (m, CH), 131.57-131.66 (m, CH), 132.59 (C), 133.51 (C), 142.60 (C), 148.65 (C), 155.02 (C), 159.88 (d,  $J$  = 257.23 Hz, C-F), 164.28 (d,  $J$  = 245.89 Hz, C-F), 202.97 (C); ESI-MS ( $m/z$ ) 334 ( $M+H$ )<sup>+</sup>; HRMS (ESI) calculated for  $C_{20}H_{16}F_2NO_2$  ( $M + H$ )<sup>+</sup> 340.1149, found 340.1140.

**(2-methyl-6-nitro-4-phenylquinolin-3-yl)(3-methyloxiran-2-yl)methanone (2l):**

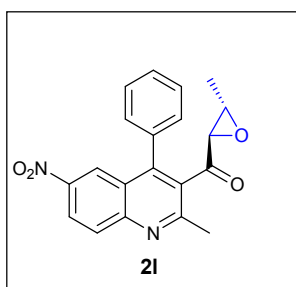

Yield 52% as white solid: mp 153-155°C; FT-IR (KBr,  $cm^{-1}$ ) 3019, 1626, 1216, 1069; <sup>1</sup>H NMR (400 MHz,  $DMSO-d_6$ )  $\delta$  1.00 (d,  $J$  = 5.04 Hz, 3H), 2.68-2.71 (m, 4H), 3.46 (d,  $J$  = 1.80 Hz, 1H), 7.38-7.39 (m, 1H), 7.51-7.53 (m, 1H), 7.61-7.69 (m, 3H), 8.27 (d,  $J$  = 9.2 Hz, 1H), 8.36 (d,  $J$  = 2.44 Hz, 1H), 8.52-8.55 (dd,  $J$  = 9.16, 2.56 Hz, 1H); <sup>13</sup>C NMR (100 MHz,  $DMSO-d_6$ )  $\delta$  17.55 ( $CH_3$ ), 23.39 ( $CH_3$ ), 57.05 (CH), 60.12 (CH), 123.02 (CH), 124.17 (C), 124.47 (CH), 129.32 (CH), 129.47 (CH), 130.30 (CH), 130.57 (CH), 130.79 (CH), 131.17



(CH), 133.08 (C), 133.49 (C), 145.72 (C), 147.48 (C), 149.67 (C), 158.74 (C) 202.66 (C); ESI-MS ( $m/z$ ) 349 ( $M+H$ )<sup>+</sup>; HRMS (ESI) calculated for C<sub>20</sub>H<sub>17</sub>N<sub>2</sub>O<sub>4</sub> ( $M+H$ )<sup>+</sup> 349.1188, found 349.1190.

**(4-(4-fluorophenyl)-2-methylquinolin-3-yl)(3-methyloxiran-2-yl)methanone (2p):**

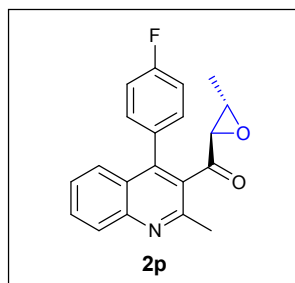

Yield 64% as white solid: mp 118-120°C; FT-IR (KBr, cm<sup>-1</sup>) 3019, 1619, 1215, 1076; <sup>1</sup>H NMR (400 MHz, CD<sub>3</sub>OD) δ 1.08 (d,  $J$  = 5.08 Hz, 3H), 2.66 (s, 3H), 2.73-2.77 (m, 1H), 3.25 (d,  $J$  = 1.76 Hz, 1H), 7.30-7.37 (m, 3H), 7.49-7.63 (m, 3H), 7.79-7.84 (m, 1H), 8.05 (d,  $J$  = 8.44 Hz, 1H); <sup>13</sup>C NMR (100 MHz, CD<sub>3</sub>OD) δ 16.08 (CH<sub>3</sub>), 22.09 (CH<sub>3</sub>), 56.55 (CH), 60.09 (CH), 115.49 (d,  $J$  = 21.89 Hz, CH), 115.53 (d,  $J$  = 21.86 Hz, CH), 124.95 (C), 125.68 (CH), 126.97 (CH), 127.71 (CH), 130.59 (d,  $J$  = 3.51 Hz, C), 130.81 (CH), 131.49 (C), 132.29 (d,  $J$  = 8.45 Hz, CH), 132.65 (d,  $J$  = 8.26 Hz, CH), 145.69 (C), 147.29 (C), 154.36 (C), 164.56 (d,  $J$  = 246.78 Hz, C-F), 203.11 (C); ESI-MS ( $m/z$ ) 322 ( $M+H$ )<sup>+</sup>; HRMS (ESI) calculated for C<sub>20</sub>H<sub>17</sub>FNO<sub>2</sub> ( $M+H$ )<sup>+</sup> 322.1243, found 322.1243.

**(4-(4-bromophenyl)-2-methylquinolin-3-yl)(3-methyloxiran-2-yl)methanone (2q):**

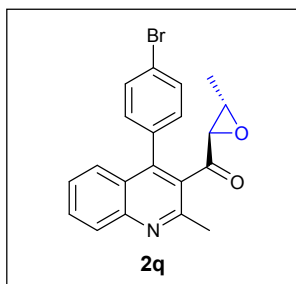

Yield 71% as yellow solid: mp 124-126°C; FT-IR (KBr, cm<sup>-1</sup>) 3019, 1637, 1215, 1069; <sup>1</sup>H NMR (400 MHz, DMSO-*d*<sub>6</sub>) δ 1.05 (d,  $J$  = 5.08 Hz, 3H), 2.52 (s, 3H), 2.74-2.78 (m, 1H), 3.46 (d,  $J$  = 1.84 Hz, 1H), 7.27-7.29 (dd,  $J$  = 8.08, 2.16 Hz, 1H), 7.39-7.42 (dd,  $J$  = 8.2, 2.2 Hz, 1H), 7.50-7.53 (dd,  $J$  = 8.36, 0.88 Hz, 1H), 7.57-7.61 (m, 1H), 7.77-7.87 (m, 3H), 8.06 (d,  $J$  = 7.96 Hz, 1H); <sup>13</sup>C NMR (100 MHz, DMSO-*d*<sub>6</sub>) δ 17.45 (CH<sub>3</sub>), 23.98 (CH<sub>3</sub>), 56.93 (CH), 60.20 (CH), 123.27 (C), 124.55 (C), 126.08 (CH), 127.68 (CH), 129.15 (CH), 131.31 (CH), 131.46 (C), 132.00 (CH), 132.17 (CH), 132.53 (CH), 132.89 (CH), 133.94 (C), 144.65

(C), 147.67 (C), 154.21 (C), 203.27 (C); ESI-MS ( $m/z$ ) 382 ( $M+H$ )<sup>+</sup>; HRMS (ESI) calculated for C<sub>20</sub>H<sub>17</sub>BrNO<sub>2</sub> ( $M + H$ )<sup>+</sup> 382.0443, found 382.0442.

**(4-(4-chlorophenyl)-2-methylquinolin-3-yl)(3-methyloxiran-2-yl)methanone (2r):**

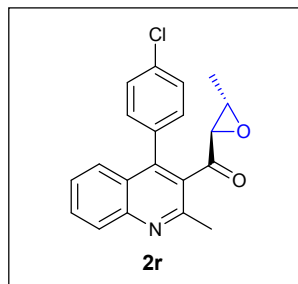

Yield 72% as white solid: mp 105-107°C; FT-IR (KBr, cm<sup>-1</sup>) 3019, 1643, 1215, 1069; <sup>1</sup>H NMR (400 MHz, DMSO-*d*<sub>6</sub>) δ 1.04 (d,  $J$  = 5.04 Hz, 3H), 2.61 (s, 3H), 2.74-2.76 (m, 1H), 3.45 (d,  $J$  = 1.84 Hz, 1H), 7.33-7.36 (dd,  $J$  = 8.12, 2.12 Hz, 1H), 7.45-7.51 (m, 2H), 7.56-7.69 (m, 3H), 7.82-7.86 (m, 1H), 8.06 (dd,  $J$  = 8.04 Hz, 1H); <sup>13</sup>C NMR (100 MHz, DMSO-*d*<sub>6</sub>) δ 17.44 (CH<sub>3</sub>), 23.96 (CH<sub>3</sub>), 56.88 (CH), 60.20 (CH), 124.63 (C), 126.06 (CH), 127.66 (CH), 129.08 (CH), 129.14 (CH), 129.23 (CH), 131.29 (CH), 131.54 (C), 132.28 (CH), 132.64 (CH), 133.56 (C), 134.55 (C), 144.61 (C), 147.67 (C), 154.19 (C), 203.27 (C); ESI-MS ( $m/z$ ) 338 ( $M+H$ )<sup>+</sup>; HRMS (ESI) calculated for C<sub>20</sub>H<sub>17</sub>ClNO<sub>2</sub> ( $M + H$ )<sup>+</sup> 338.0948, found 338.0944.

**(4-(4-methoxyphenyl)-2-methylquinolin-3-yl)(3-methyloxiran-2-yl)methanone (2s):**

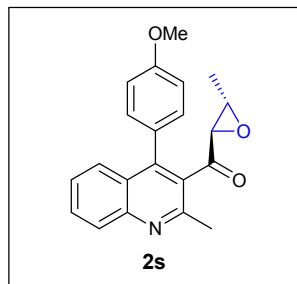

Yield 67% as white solid: mp 112-114°C; FT-IR (KBr, cm<sup>-1</sup>) 3019, 1637, 1215, 1069; <sup>1</sup>H NMR (400 MHz, DMSO-*d*<sub>6</sub>) δ 1.00 (d,  $J$  = 5.04 Hz, 3H), 2.59 (s, 3H), 3.36 (d,  $J$  = 1.84 Hz, 1H), 3.85 (s, 3H), 7.10-7.17 (m, 2H), 7.22-7.25 (dd,  $J$  = 8.24, 2.0 Hz, 1H), 7.35-7.37 (dd,  $J$  = 8.44, 2.2 Hz, 1H), 7.54-7.61 (m, 2H), 7.79-7.84 (m, 1H), 8.03 (d,  $J$  = 8.32 Hz, 1H); <sup>13</sup>C NMR (100 MHz, DMSO-*d*<sub>6</sub>) δ 17.58 (CH<sub>3</sub>), 23.95 (CH<sub>3</sub>), 55.79 (CH<sub>3</sub>), 56.75 (CH), 60.23 (CH), 114.58 (CH), 114.63 (CH), 125.13 (C), 126.23 (CH), 123.63 (C), 127.37 (CH), 129.10 (CH), 131.08 (CH), 131.72 (C), 131.98 (CH), 132.16 (CH), 145.70 (C), 147.75 (C), 154.21 (C), 160.27 (C), 203.42 (C); ESI-MS ( $m/z$ ) 334 ( $M+H$ )<sup>+</sup>; HRMS (ESI) calculated for C<sub>21</sub>H<sub>20</sub>NO<sub>3</sub> ( $M + H$ )<sup>+</sup> 334.1443, found 334.1430.

**(2,4-dimethylquinolin-3-yl)(3-methyloxiran-2-yl)methanone (2t):**

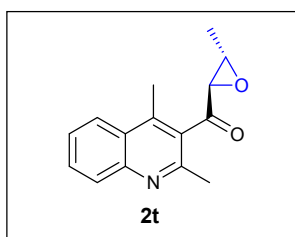

Yield 62% as white solid: mp 120-122°C; FT-IR (KBr,  $\text{cm}^{-1}$ ) 3021, 1636, 1216, 1069;  $^1\text{H}$  NMR (300 MHz,  $\text{CDCl}_3$ )  $\delta$  1.43 (d,  $J = 5.13$  Hz, 3H), 2.60 (s, 3H), 2.64 (s, 3H), 3.04-3.09 (m, 1H), 3.56 (d,  $J = 1.83$  Hz, 1H), 7.53-7.59 (m, 1H), 7.70-7.76 (m, 1H), 7.97-8.04 (m, 2H);  $^{13}\text{C}$  NMR (75 MHz,  $\text{CDCl}_3$ )  $\delta$  15.79 ( $\text{CH}_3$ ), 17.42 ( $\text{CH}_3$ ), 23.73 ( $\text{CH}_3$ ), 55.67 (CH), 61.45 (CH), 123.73 (CH), 125.71 (C), 126.47 (CH), 129.33 (CH), 130.27 (CH), 130.55 (C), 141.66 (C), 147.31 (C), 153.89 (C), 205.13 (C); ESI-MS ( $m/z$ ) 242 ( $\text{M}+\text{H}$ ) $^+$  for  $\text{C}_{15}\text{H}_{16}\text{NO}_3$ .

**(2-methyl-4-phenylquinolin-3-yl)(oxiran-2-yl)methanone (2u):**

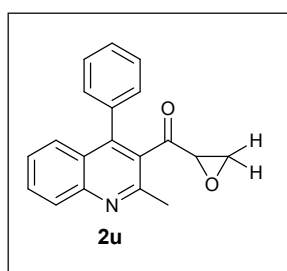

Yield 20% as white solid: mp 133-135°C; FT-IR (KBr,  $\text{cm}^{-1}$ ) 3019, 1651, 1215, 1069;  $^1\text{H}$  NMR (400 MHz,  $\text{CDCl}_3$ )  $\delta$  2.45-2.47 (dd,  $J = 6.44, 2.36$  Hz, 1H), 2.59-2.62 (q,  $J = 4.48$  Hz, 1H), 2.72 (s, 3H), 3.26-3.27 (q,  $J = 2.36$  Hz, 1H), 7.31-7.33 (m, 1H), 7.45-7.56 (m, 5H), 7.65-7.67 (m, 1H), 7.74-7.78 (m, 1H), 8.10 (d,  $J = 8.4$  Hz, 1H);  $^{13}\text{C}$  NMR (100 MHz,  $\text{CDCl}_3$ )  $\delta$  23.95 ( $\text{CH}_3$ ), 47.54 ( $\text{CH}_2$ ), 53.55 (CH), 124.80 (C), 126.20 (CH), 126.75 (CH), 128.52 (CH), 128.70 (CH), 129.01 (CH), 129.22 (CH), 130.35 (CH), 130.70 (C&CH), 130.76 (CH), 134.84 (C), 146.35 (C), 148.04 (C), 154.40 (C), 203.13 (C); ESI-MS ( $m/z$ ) 290 ( $\text{M}+\text{H}$ ) $^+$ ; HRMS (ESI) calculated for  $\text{C}_{19}\text{H}_{16}\text{NO}_2$  ( $\text{M} + \text{H}$ ) $^+$  290.1181, found 290.1179.

**2-bromo-1-(2-methyl-4-phenylquinolin-3-yl)ethanone (3):**

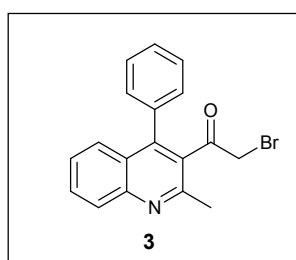

Yield 90% as white solid: mp 175-177°C; FT-IR (KBr,  $\text{cm}^{-1}$ ) 3021, 1621, 1215, 1069;  $^1\text{H}$ NMR (400 MHz,  $\text{CDCl}_3$ )  $\delta$  2.75 (s, 3H), 3.51 (s, 2H), 7.37-7.39 (m, 2H), 7.45-7.49 (m, 1H), 7.53-7.57 (m, 3H), 7.64-7.66 (dd,  $J = 8.4, 0.8$  Hz, 1H), 7.73-7.78 (m, 1H), 8.10 (d,  $J = 8.44$  Hz, 1H);  $^{13}\text{C}$  NMR (100 MHz,  $\text{CDCl}_3$ )  $\delta$  24.01 ( $\text{CH}_3$ ), 35.21 ( $\text{CH}_2$ ), 124.61 (C), 126.25 (CH), 126.79 (CH), 129.05 (CH), 129.15 (2 $\times$ CH), 129.47 (CH), 129.92 (2 $\times$ CH), 130.70 (CH), 131.36 (C), 134.96 (C), 144.77 (C), 147.96 (C), 154.93 (C), 198.35 (C); ESI-MS ( $m/z$ ) 340 ( $\text{M}+\text{H}$ ) $^+$  for  $\text{C}_{18}\text{H}_{15}\text{BrNO}$ .

**2-methyl-4-phenylquinolin-3-yl acetate (4):**

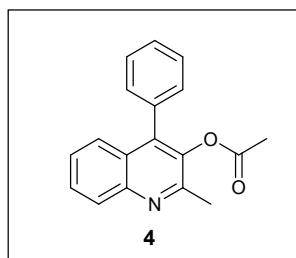

Yield 50% as light yellow solid: mp 97-99°C; FT-IR (KBr,  $\text{cm}^{-1}$ ) 3019, 1626, 1216, 1069;  $^1\text{H}$ NMR (400 MHz,  $\text{CDCl}_3$ )  $\delta$  2.78 (s, 3H), 3.58 (s, 2H), 7.34-7.37 (m, 2H), 7.41-7.51 (m, 4H), 7.57-7.59 (dd,  $J = 8.4, 0.84$  Hz, 1H), 7.69-7.74 (m, 1H), 8.08 (d,  $J = 8.4$  Hz, 1H);  $^{13}\text{C}$  NMR (100 MHz,  $\text{CDCl}_3$ )  $\delta$  23.80 ( $\text{CH}_3$ ), 52.15 ( $\text{CH}_3$ ), 125.09 (C), 126.46 (CH), 126.54 (CH), 127.28 (CH), 128.28 (2 $\times$ CH), 128.50 (CH), 128.88 (CH), 129.25 (2 $\times$ CH), 130.32 (CH), 135.69 (C), 146.41 (C), 147.78 (C), 154.56 (C), 169.01 (C); ESI-MS ( $m/z$ ) 278 ( $\text{M}+\text{H}$ ) $^+$  for  $\text{C}_{18}\text{H}_{16}\text{NO}_2$ .

**2-methyl-4-phenylquinolin-3-ol (5a):**

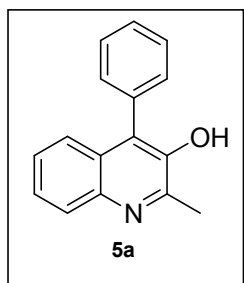

Yield 62% as light yellow solid: mp 239-241°C; FT-IR (KBr,  $\text{cm}^{-1}$ ) 3400, 3019, 1638, 1215, 1068;  $^1\text{H}$  NMR (500 MHz,  $\text{DMSO}-d_6$ )  $\delta$  2.64 (s, 3H), 7.24-7.26 (dd,  $J = 8.35, 0.8$  Hz, 1H), 7.33-7.37 (m, 3H), 7.47-7.51 (m, 2H), 7.54-7.57 (m, 2H), 7.87-7.89 (m, 3H), 8.90 (s, 1H);

$^{13}\text{C}$  NMR (100 MHz,  $\text{DMSO}-d_6$ )  $\delta$  21.72 ( $\text{CH}_3$ ), 124.63 (CH), 126.24 (CH), 126.30 (CH), 128.01 (C), 128.35 (CH), 128.70 (CH), 128.99 ( $2\times\text{CH}$ ), 129.23 (C), 130.84 ( $2\times\text{CH}$ ), 134.29 (C), 142.58 (C), 145.92 (C), 153.02 (C); ESI-MS ( $m/z$ ) 236 ( $\text{M}+\text{H}$ ) $^+$ ; HRMS (ESI) calculated for  $\text{C}_{16}\text{H}_{14}\text{NO}$  ( $\text{M} + \text{H}$ ) $^+$ : 236.1075, found 236.1075.

**6-chloro-2-methyl-4-phenylquinolin-3-ol (5b):**

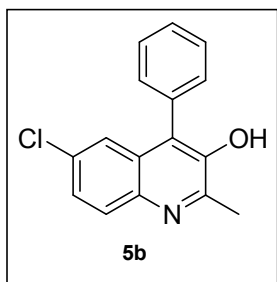

Yield 61% as light brown solid: mp 235-237°C; FT-IR (KBr,  $\text{cm}^{-1}$ ) 3399, 3019, 1603, 1216, 1071;  $^1\text{H}$  NMR (500 MHz,  $\text{DMSO}-d_6$ )  $\delta$  2.63 (s, 3H), 7.15 (d,  $J = 2.2$  Hz, 1H), 7.35-7.37 (m, 2H), 7.48-7.53 (m, 2H), 7.56-7.59 (m, 2H), 7.90 (d,  $J = 8.9$  Hz, 1H), 9.19 (s, 1H);  $^{13}\text{C}$  NMR (100 MHz,  $\text{DMSO}-d_6$ )  $\delta$  21.73 ( $\text{CH}_3$ ), 123.09 (CH), 126.66 (CH), 128.24 (C), 128.70 (CH), 129.11 (C), 129.22 ( $2\times\text{CH}$ ), 130.78 ( $2\times\text{CH}$ ), 130.83 (C), 130.92 (CH), 133.59 (C), 140.89 (C), 146.86 (C), 153.83 (C); ESI-MS ( $m/z$ ) 270 ( $\text{M}+\text{H}$ ) $^+$ ; HRMS (ESI) calculated for  $\text{C}_{16}\text{H}_{13}\text{ClNO}$  ( $\text{M} + \text{H}$ ) $^+$ : 270.0686, found 270.0676.

**6-chloro-4-(2-chlorophenyl)-2-methylquinolin-3-ol (5c):**

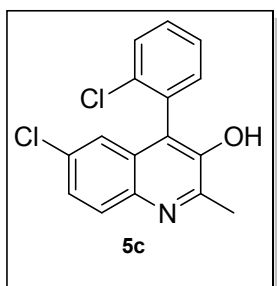

Yield 58% as white solid: mp 221-223°C; FT-IR (KBr,  $\text{cm}^{-1}$ ) 3400, 3019, 1638, 1215, 1068;  $^1\text{H}$  NMR (500 MHz,  $\text{DMSO}-d_6$ )  $\delta$  2.64 (s, 3H), 6.90 (d,  $J = 2.25$  Hz, 1H), 7.37-7.39 (dd,  $J = 7.5, 1.8$  Hz, 1H), 7.49-7.58 (m, 3H), 7.68-7.69 (dd,  $J = 7.8, 1.15$  Hz, 1H), 7.92 (d,  $J = 8.9$  Hz, 1H), 9.51 (s, 1H);  $^{13}\text{C}$  NMR (100 MHz,  $\text{DMSO}-d_6$ )  $\delta$  21.65 ( $\text{CH}_3$ ), 122.54 (CH), 125.07 (C), 126.73 (CH), 128.12 (CH), 128.71 (C), 130.19 (CH), 130.92 (CH), 130.98 (CH), 131.12 (C), 132.59 (C), 132.85 (CH), 134.04 (C), 140.66 (C), 147.40 (C), 153.86 (C); ESI-MS ( $m/z$ ) 304 ( $\text{M}+\text{H}$ ) $^+$ ; HRMS (ESI) calculated for  $\text{C}_{16}\text{H}_{12}\text{Cl}_2\text{NO}$  ( $\text{M} + \text{H}$ ) $^+$ : 304.0296, found 304.0286.

**6-chloro-4-(2-fluorophenyl)-2-methylquinolin-3-ol (5d):**

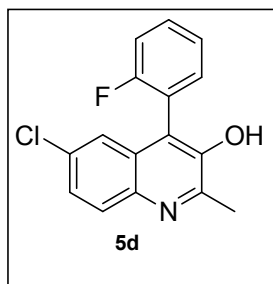

Yield 63% as light yellow solid: mp 237-239°C; FT-IR (KBr,  $\text{cm}^{-1}$ ) 3399, 3019, 1619, 1215;  $^1\text{H}$  NMR (500 MHz,  $\text{DMSO-}d_6$ )  $\delta$  2.64 (s, 3H), 7.07 (s, 1H), 7.38-7.44 (m, 3H), 7.51-7.53 (dd,  $J = 8.85, 2.3$  Hz, 1H), 7.57-7.62 (m, 1H), 7.92 (d,  $J = 8.85$  Hz, 1H), 9.54 (s, 1H);  $^{13}\text{C}$  NMR (100 MHz,  $\text{DMSO-}d_6$ )  $\delta$  21.68 ( $\text{CH}_3$ ), 116.60 (d,  $J = 21.6$  Hz, CH), 121.04 (d,  $J = 16.82$  Hz, C), 121.96 (C), 122.61 (CH), 125.33 (CH), 126.83 (CH), 128.88 (C), 131.02 (CH), 131.20 (C), 131.48 (d,  $J = 8.1$  Hz, CH), 133.0 (CH), 140.73 (C), 147.77 (C), 153.83 (C), 161.56 (d,  $J = 243.59$  Hz, C-F); ESI-MS ( $m/z$ ) 288 ( $\text{M}+\text{H}$ ) $^+$ ; HRMS (ESI) calculated for  $\text{C}_{16}\text{H}_{12}\text{ClFNO}$  ( $\text{M} + \text{H}$ ) $^+$ : 288.0591, found 288.0581.

**6-chloro-4-(2-fluorophenyl)-2-methylquinolin-3-ol (5e):**

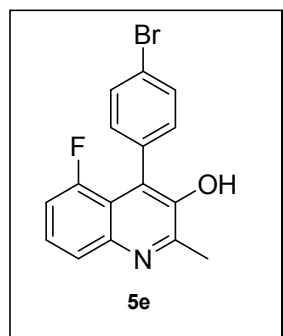

Yield 56% as white yellow solid: mp 277-279°C; FT-IR (KBr,  $\text{cm}^{-1}$ ) 3400, 3019, 1609, 1215, 1069;  $^1\text{H}$  NMR (400 MHz,  $\text{DMSO-}d_6$ )  $\delta$  2.62 (s, 3H), 7.09-7.15 (m, 1H), 7.27 (d,  $J = 8.24$  Hz, 2H), 7.44-7.49 (m, 1H), 7.61-7.65 (m, 2H), 7.74 (d,  $J = 7.92$  Hz, 1H), 9.07 (s, 1H);  $^{13}\text{C}$  NMR (100 MHz,  $\text{DMSO-}d_6$ )  $\delta$  21.62 ( $\text{CH}_3$ ), 111.80 (d,  $J = 21.22$  Hz, CH), 117.82 (d,  $J = 8.74$  Hz, C), 121.36 (C), 124.80 (C), 125.29 (CH), 126.19 (d,  $J = 9.46$  Hz, CH), 131.26 (2 $\times$ CH), 132.14 (2 $\times$ CH), 135.64 (C), 143.88 (C), 147.25 (C), 153.96 (C), 158.57 (d,  $J = 251.96$  Hz, C-F); ESI-MS ( $m/z$ ) 332 ( $\text{M}+\text{H}$ ) $^+$ ; HRMS (ESI) calculated for  $\text{C}_{16}\text{H}_{12}\text{BrFNO}$  ( $\text{M}+\text{H}$ ) $^+$ : 332.0086, found 332.0088.

#### 4-(4-bromophenyl)-2-methylquinolin-3-ol (5f):

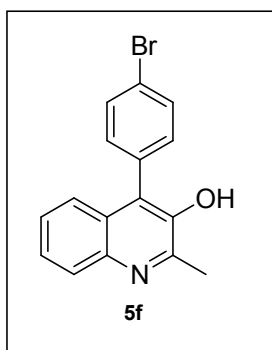

Yield 52% as white solid: mp 288-290°C; FT-IR (KBr,  $\text{cm}^{-1}$ ) 3399, 3019, 1618, 1215;  $^1\text{H}$  NMR (400 MHz,  $\text{DMSO}-d_6$ )  $\delta$  2.63 (s, 3H), 7.24 (d,  $J = 8.16$  Hz, 1H), 7.31-7.38 (m, 3H), 7.48-7.52 (m, 1H), 7.74 (d,  $J = 8.32$  Hz, 2H), 7.88 (d,  $J = 8.16$  Hz, 2H), 9.03 (s, 1H);  $^{13}\text{C}$  NMR (100 MHz,  $\text{DMSO}-d_6$ )  $\delta$  21.69 ( $\text{CH}_3$ ), 121.87 (C), 124.38 (CH), 126.40 (CH), 126.45 (CH), 127.66 (C), 127.78 (C), 128.76 (CH), 132.04 ( $2\times\text{CH}$ ), 133.13 ( $2\times\text{CH}$ ), 133.55 (C), 142.51 (C), 145.95 (C), 153.02 (C); ESI-MS ( $m/z$ ) 314 ( $\text{M}+\text{H}$ ) $^+$ ; HRMS (ESI) calculated for  $\text{C}_{16}\text{H}_{13}\text{BrNO}$  ( $\text{M} + \text{H}$ ) $^+$ : 314.0181, found 314.0184.

#### 4-(4-chlorophenyl)-2-methylquinolin-3-ol (5g):

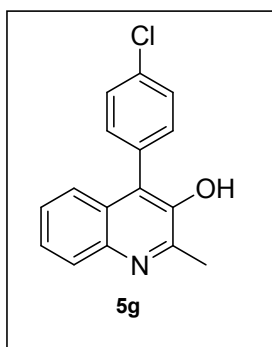

Yield 55% as white solid: mp 270-273°C; FT-IR (KBr,  $\text{cm}^{-1}$ ) 3399, 3019, 1602, 1215, 1070;  $^1\text{H}$  NMR (500 MHz,  $\text{DMSO}-d_6$ )  $\delta$  2.64 (s, 3H), 7.25 (d,  $J = 8.95$  Hz, 1H), 7.34-7.40 (m, 3H), 7.48-7.57 (m, 3H), 7.91 (d,  $J = 1.9$  Hz, 2H), 9.03 (s, 1H);  $^{13}\text{C}$  NMR (100 MHz,  $\text{DMSO}-d_6$ )  $\delta$  21.79 ( $\text{CH}_3$ ), 126.66 (CH), 126.77 (C & CH), 127.29 (CH), 128.58 (CH), 129.11 ( $2\times\text{CH}$ ), 129.27 (C), 130.80 (C &  $2\times\text{CH}$ ), 133.77 (C), 142.83 (C), 146.37 (C), 154.68 (C); ESI-MS ( $m/z$ ) 270 ( $\text{M}+\text{H}$ ) $^+$ ; HRMS (ESI) calculated for  $\text{C}_{16}\text{H}_{13}\text{ClNO}$  ( $\text{M} + \text{H}$ ) $^+$ : 270.0686, found 270.0677.

**4-(4-methoxyphenyl)-2-methylquinolin-3-ol (5h):**

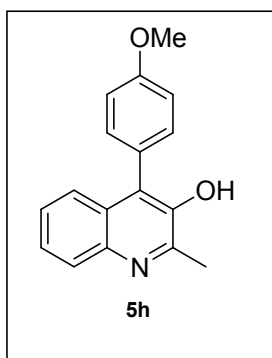

Yield 64% as light yellow solid: mp 221-222°C; FT-IR (KBr,  $\text{cm}^{-1}$ ) 3399, 3019, 1643, 1215, 1068;  $^1\text{H}$  NMR (400 MHz,  $\text{DMSO}-d_6$ )  $\delta$  2.63 (s, 3H), 3.86 (s, 3H), 7.10-7.14 (m, 2H), 7.27-7.38 (m, 4H), 7.46-7.51 (m, 1H), 7.87-7.89 (m, 1H), 8.82 (s, 1H);  $^{13}\text{C}$  NMR (100 MHz,  $\text{DMSO}-d_6$ )  $\delta$  21.69 ( $\text{CH}_3$ ), 55.61 ( $\text{CH}_3$ ), 114.54 ( $2\times\text{CH}$ ), 124.73 (CH), 126.00 (C), 126.13 (CH), 126.21 (CH), 128.31 (C), 128.67 (CH), 128.84 (C), 132.09 ( $2\times\text{CH}$ ), 142.62 (C), 146.14 (C), 152.88 (C), 159.41 (C); ESI-MS ( $m/z$ ) 266 ( $\text{M}+\text{H}$ ) $^+$ ; HRMS (ESI) calculated for  $\text{C}_{17}\text{H}_{16}\text{NO}_2$  ( $\text{M} + \text{H}$ ) $^+$ : 266.1181, found 266.1174.



## X-Ray Data Collection and Structure Refinement Details:

A good quality single crystal of size 0.20 x 0.20 x 0.20 mm, was selected under a polarizing microscope and was mounted on a glass fiber for data collection. Single crystal X-ray data for compound **2b** were collected on the Rigaku Kappa 3 circle diffractometer equipped with the AFC12 goniometer and enhanced sensitivity (HG) Saturn724+ CCD detector in the 4x4 bin mode using the monochromated Mo-K $\alpha$  radiation generated from the microfocus sealed tube MicroMax-003 X-ray generator equipped with specially designed confocal multilayer optics. Data collection was performed using  $\omega$ -scans of 0.5 $^\circ$  steps at 293(2) K. Cell determination, data collection and data reduction was performed using the Rigaku CrystalClear-SM Expert 2.1 b24<sup>1</sup> software. Structure solution and refinement were performed by using SHELX-97<sup>2</sup>. Refinement of coordinates and anisotropic thermal parameters of non-hydrogen atoms were carried out by the full-matrix least-squares method. The hydrogen atoms attached to carbon atoms were generated with idealized geometries and isotropically refined using a riding model.

### ORTEP diagram of compound **2b** (CCDC 1492781)

1. CrystalClear 2.1, Rigaku Corporation, Tokyo, Japan.
2. Sheldrick, G. M. Acta Crystallogr., Sect. A 2008, 64, 112–122.

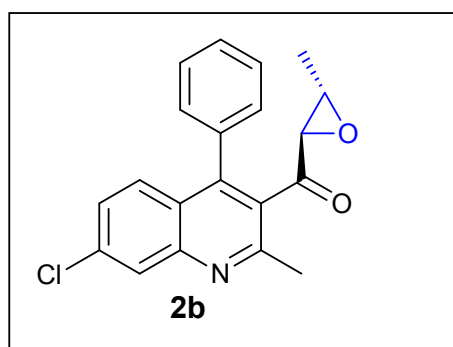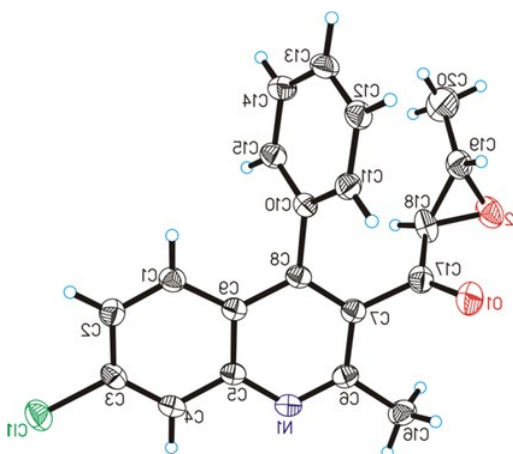

**Figure 1** ORTEP diagram drawn with 30% ellipsoid probability for non-H atoms of the asymmetric unit of the crystal structure of compound **2b** determined at 293 K.

**Table 1** Crystal data and structure refinement details for **2b**

| Compound                                          | <b>2b</b>                                           |
|---------------------------------------------------|-----------------------------------------------------|
| Empirical formula                                 | C <sub>20</sub> H <sub>16</sub> Cl N O <sub>2</sub> |
| Formula weight                                    | 337.79                                              |
| Crystal System                                    | Orthorhombic                                        |
| Space group                                       | Pbca                                                |
| a (Å)                                             | 7.8745(17)                                          |
| b (Å)                                             | 19.699(4)                                           |
| c (Å)                                             | 21.755(5)                                           |
| $\alpha$ (°)                                      | 90.00                                               |
| $\beta$ (°)                                       | 90.00                                               |
| $\gamma$ (°)                                      | 90.00                                               |
| V (Å <sup>3</sup> )                               | 3374.6(13)                                          |
| Z                                                 | 8                                                   |
| D <sub>c</sub> (g/cm <sup>3</sup> )               | 1.330                                               |
| F <sub>000</sub>                                  | 1408                                                |
| $\mu$ (mm <sup>-1</sup> )                         | 0.238                                               |
| $\theta_{\max}$ (°)                               | 25.25                                               |
| Total reflections                                 | 19869                                               |
| Unique reflections                                | 3017                                                |
| Reflections [I<br>2 $\sigma$ (I)]                 | 1861                                                |
| Parameters                                        | 225                                                 |
| R <sub>int</sub>                                  | 0.1129                                              |
| Goodness-of-fit                                   | 0.879                                               |
| R [F <sup>2</sup> > 2 $\sigma$ (F <sup>2</sup> )] | 0.0469                                              |
| wR (F <sup>2</sup> , all data)                    | 0.1126                                              |
| CCDC No.                                          | 1492781                                             |

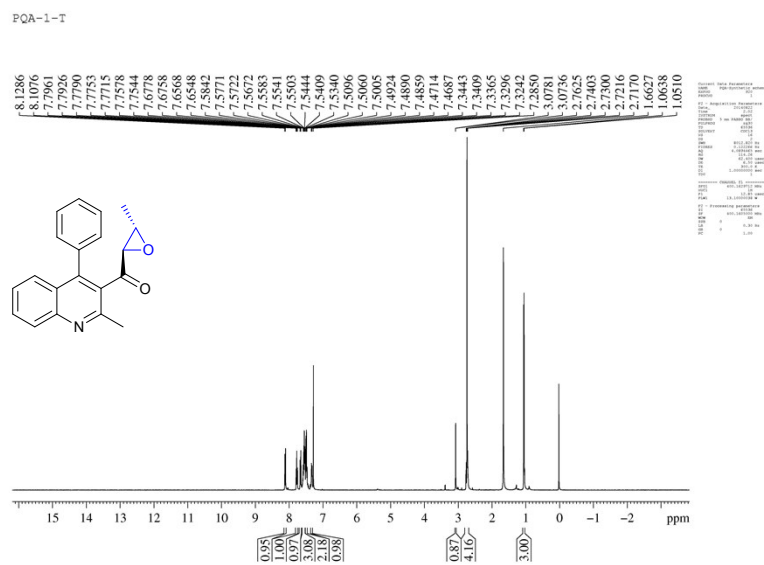

<sup>1</sup>H NMR Spectra of **2a** (400 MHz, CDCl<sub>3</sub>)

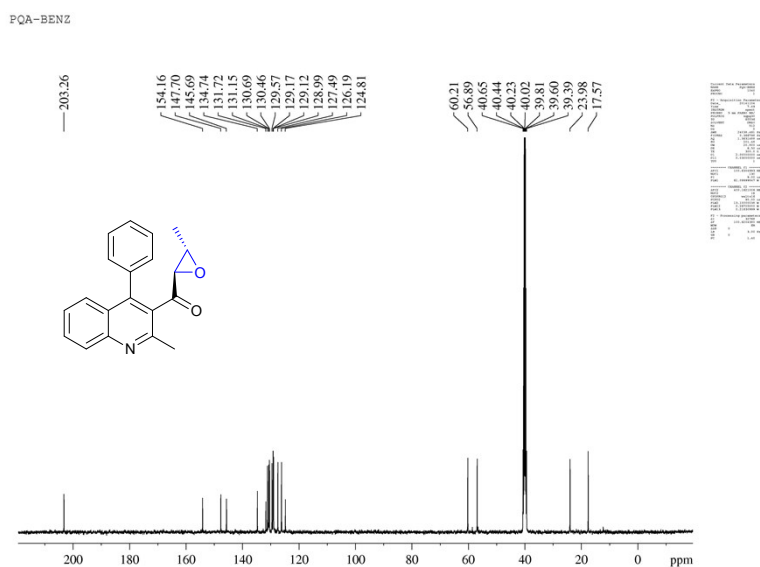

<sup>13</sup>C NMR Spectra of **2a** (100 MHz, DMSO-*d*<sub>6</sub>)

PQA-4CL-E

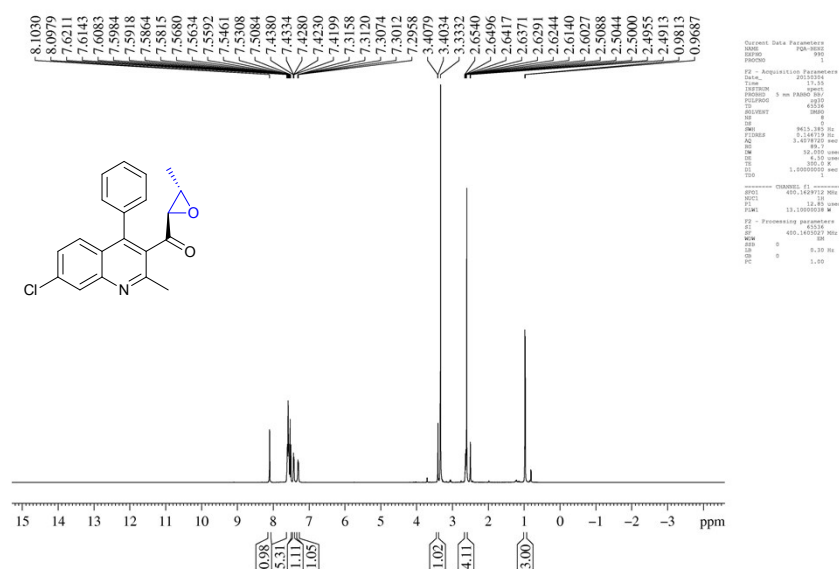

<sup>1</sup>H NMR Spectra of **2b** (400 MHz, DMSO-*d*<sub>6</sub>)

PQA-4CL-E

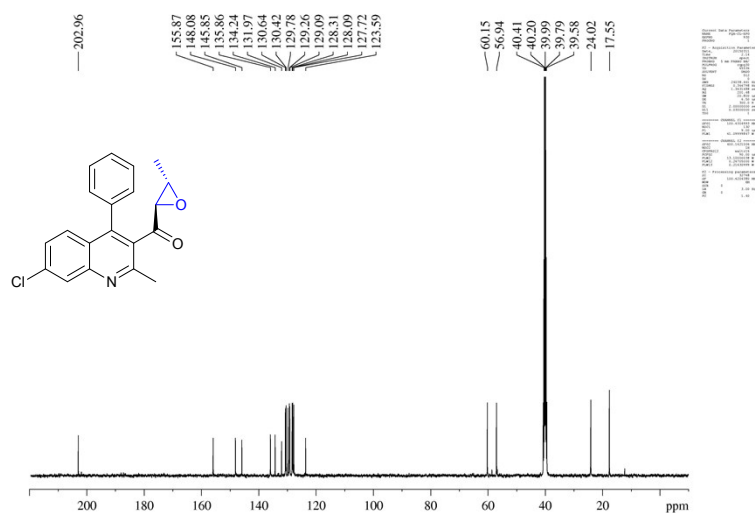

<sup>13</sup>C NMR Spectra of **2b** (100 MHz, DMSO-*d*<sub>6</sub>)

CL-E

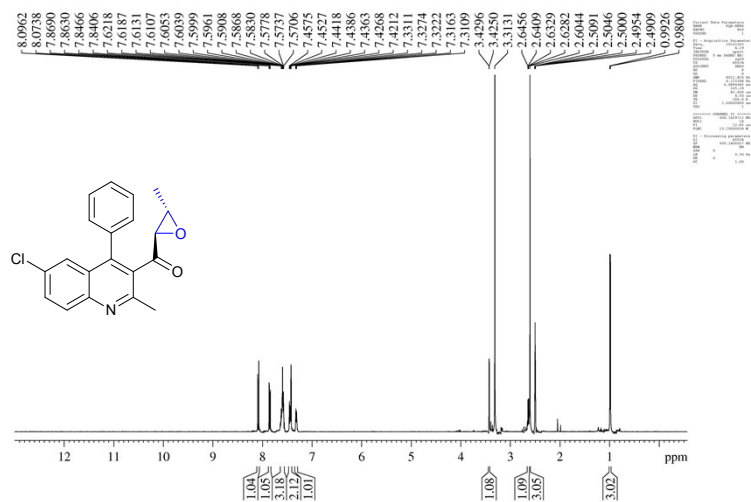

<sup>1</sup>H NMR Spectra of **2c** (400 MHz, DMSO-*d*<sub>6</sub>)

CL-E

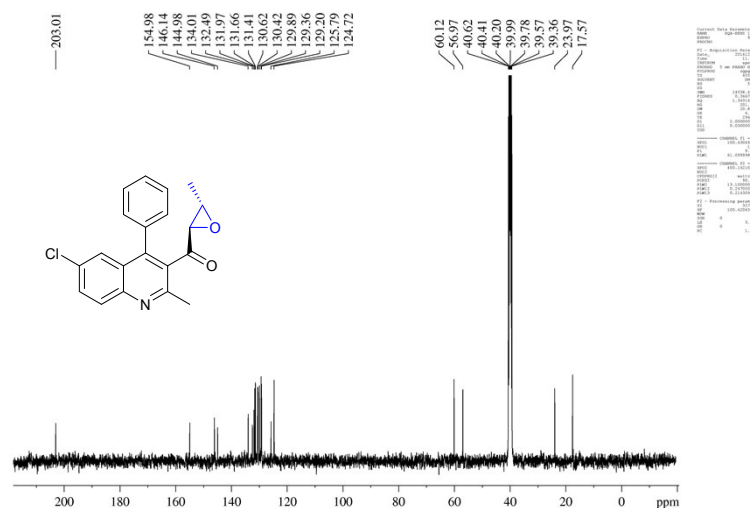

<sup>13</sup>C NMR Spectra of **2c** (100 MHz, DMSO-*d*<sub>6</sub>)

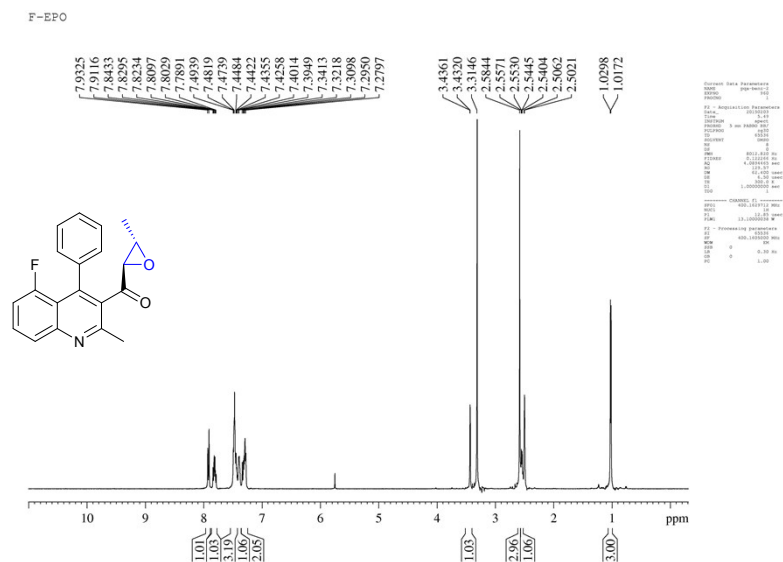

<sup>1</sup>H NMR Spectra of **2d** (400 MHz, DMSO-*d*<sub>6</sub>)

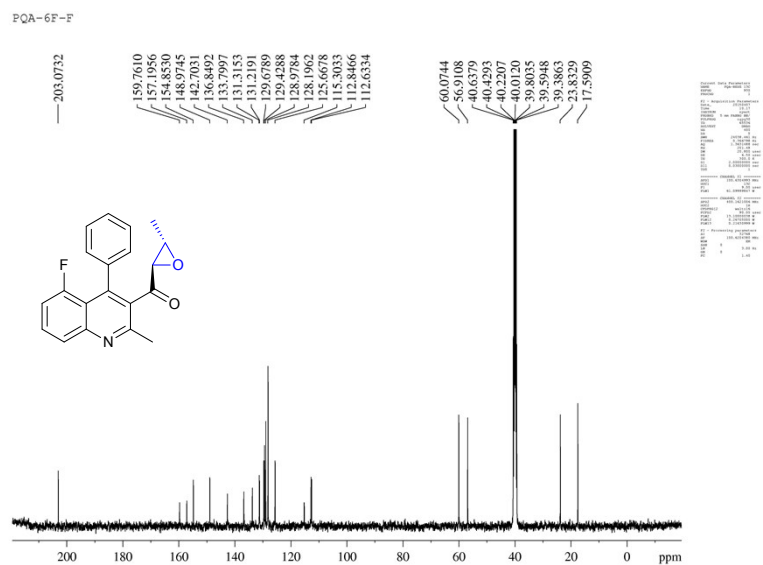

<sup>13</sup>C NMR Spectra of **2d** (100 MHz, DMSO-*d*<sub>6</sub>)



CLBR-E

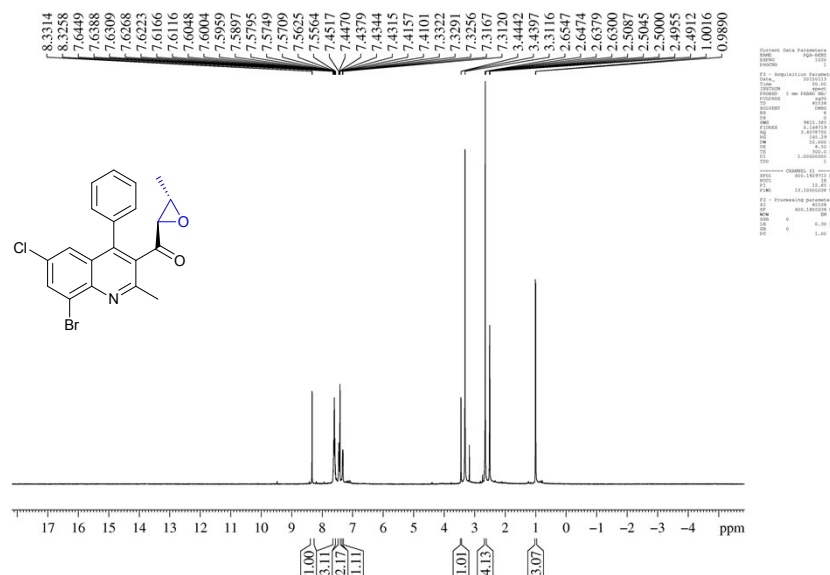

<sup>1</sup>H NMR Spectra of **2f** (400 MHz, DMSO-*d*<sub>6</sub>)

CLBR-E

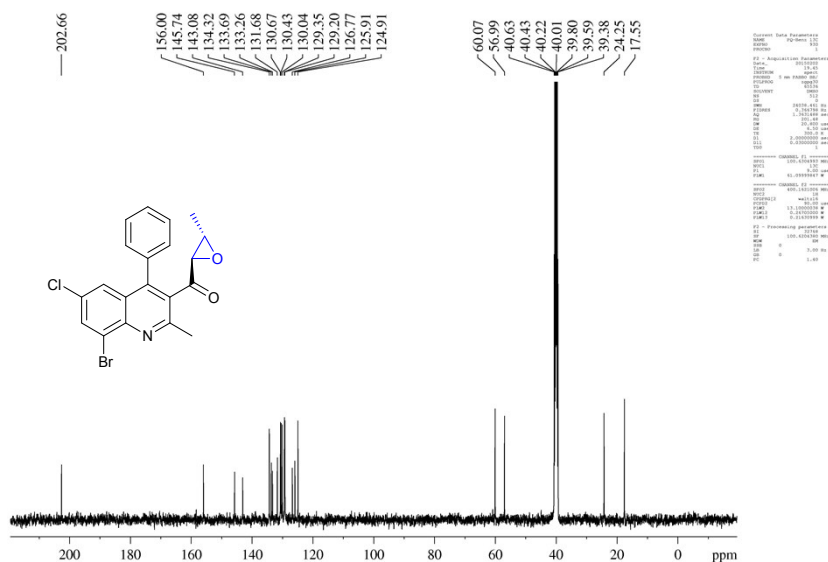

<sup>13</sup>C NMR Spectra of **2f** (100 MHz, DMSO-*d*<sub>6</sub>)



PQA-DIBR-E

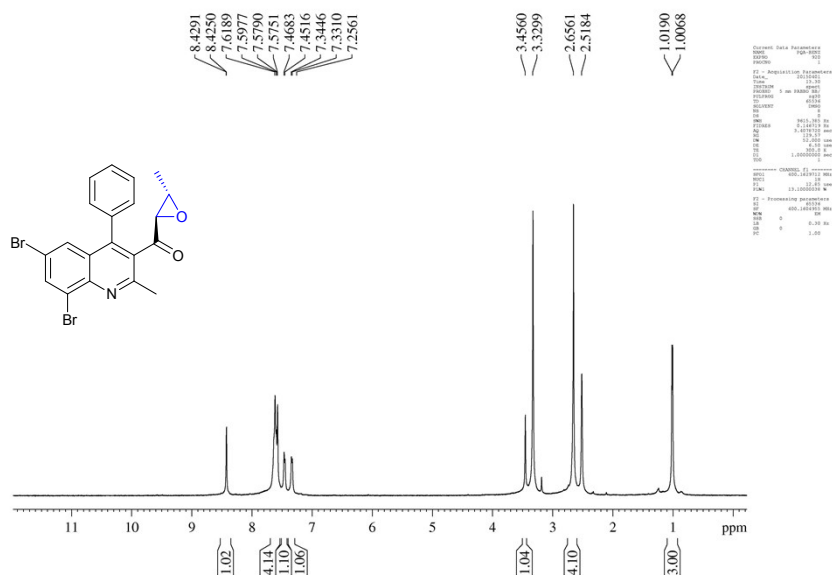

**<sup>1</sup>H NMR Spectra of **2g** (400 MHz, DMSO-*d*<sub>6</sub>)**

dibr-e

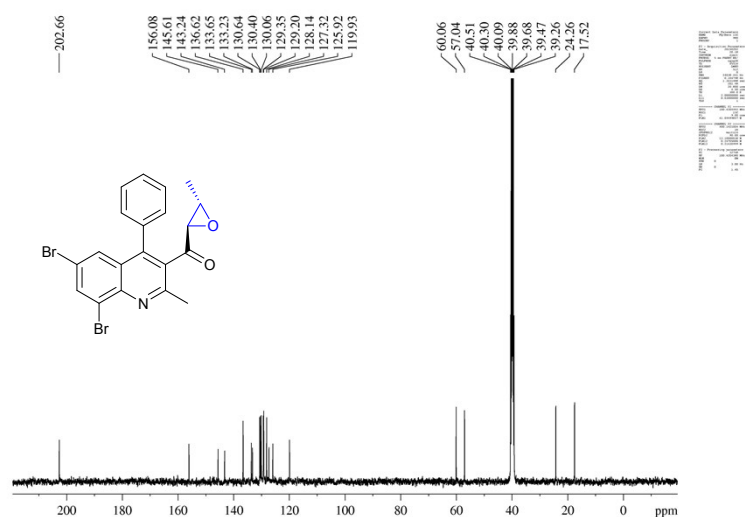

**<sup>13</sup>C NMR Spectra of **2g** (100 MHz, DMSO-*d*<sub>6</sub>)**

DICL BR-EPO

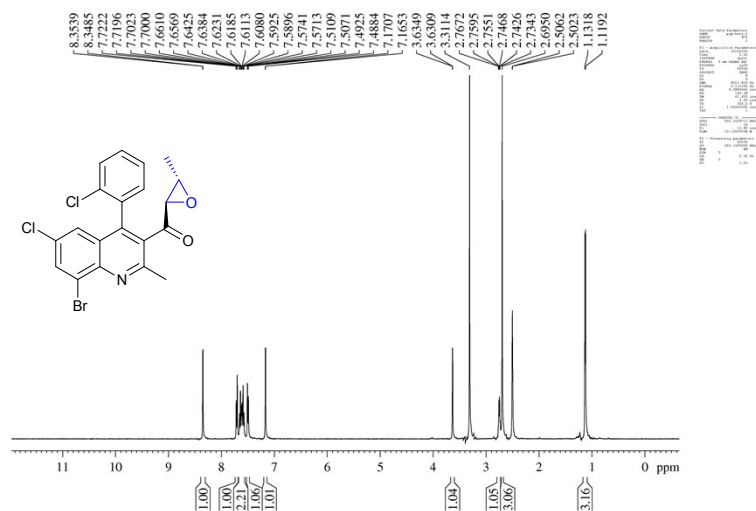

<sup>1</sup>H NMR Spectra of **2h** (400 MHz, DMSO-*d*<sub>6</sub>)

DICLBR-F

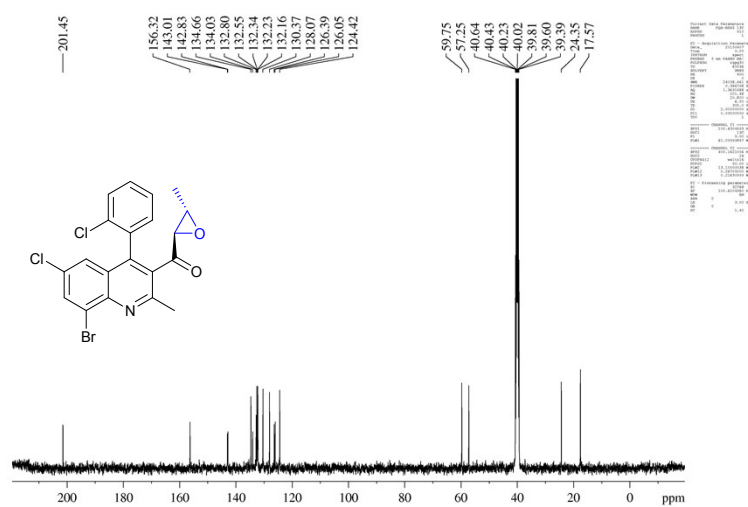

<sup>13</sup>C NMR Spectra of **2h** (100 MHz, DMSO-*d*<sub>6</sub>)

5Cl-4Br

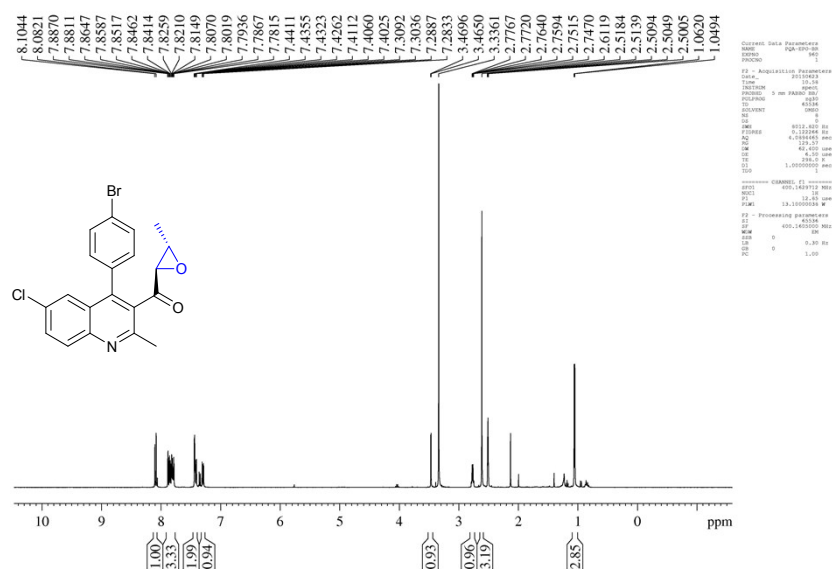

<sup>1</sup>H NMR Spectra of **2i** (400 MHz, DMSO-*d*<sub>6</sub>)

5U-4BR

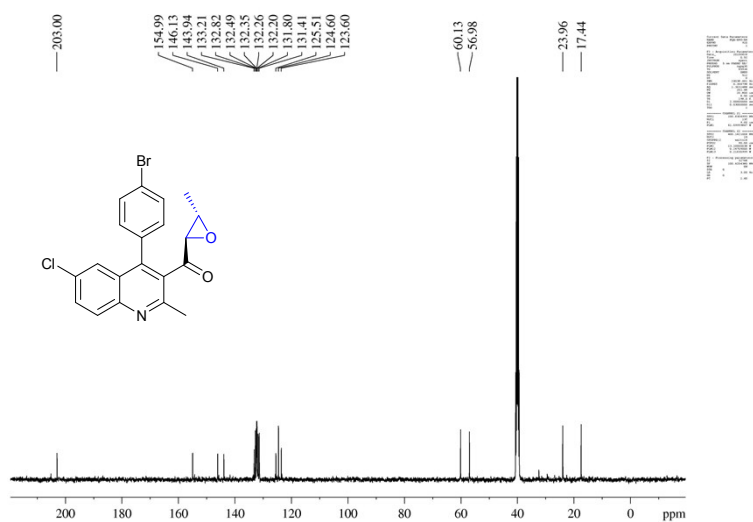

<sup>13</sup>C NMR Spectra of **2i** (100 MHz, DMSO-*d*<sub>6</sub>)

6F-4Br

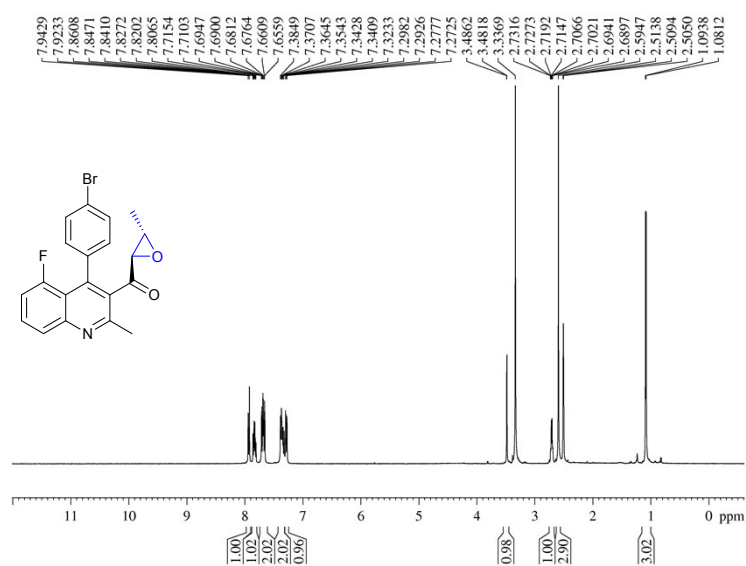

<sup>1</sup>H NMR Spectra of **2j** (400 MHz, DMSO-*d*<sub>6</sub>)

6F-4Br

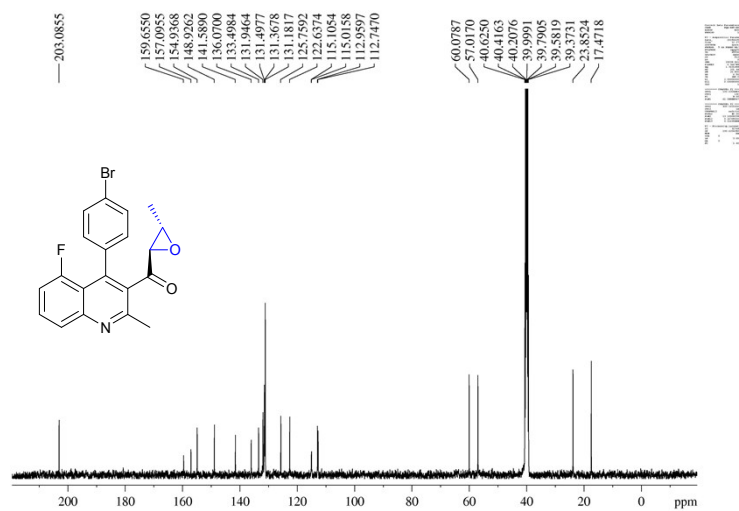

<sup>13</sup>C NMR Spectra of **2j** (100 MHz, DMSO-*d*<sub>6</sub>)

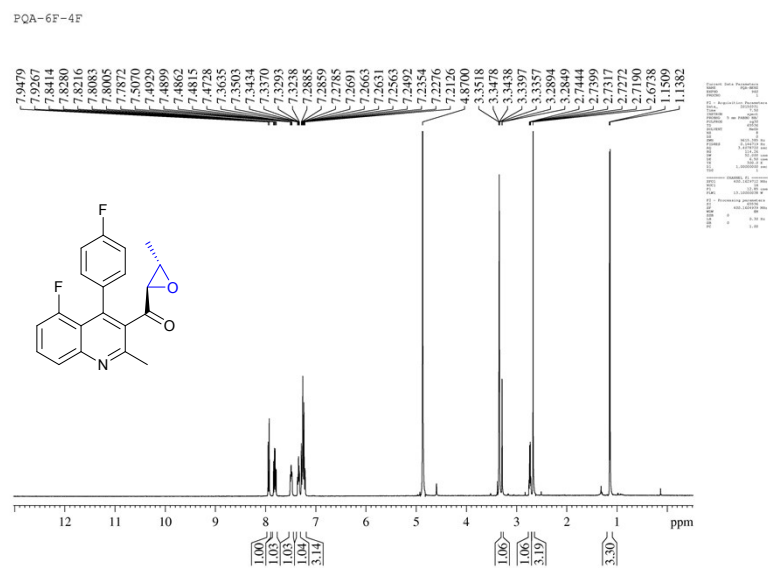

<sup>1</sup>H NMR Spectra of **2k** (400 MHz, CD<sub>3</sub>OD)

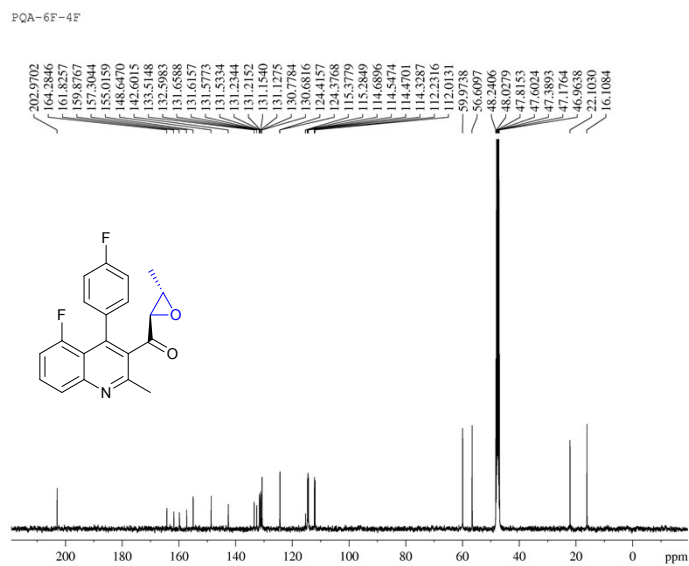

<sup>13</sup>C NMR Spectra of **2k** (100 MHz, CD<sub>3</sub>OD)

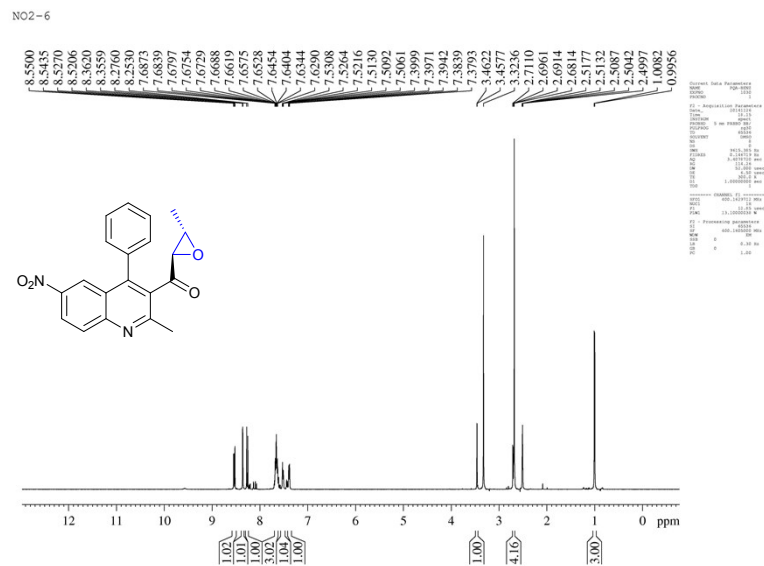

<sup>1</sup>H NMR Spectra of **21** (400 MHz, DMSO-*d*<sub>6</sub>)

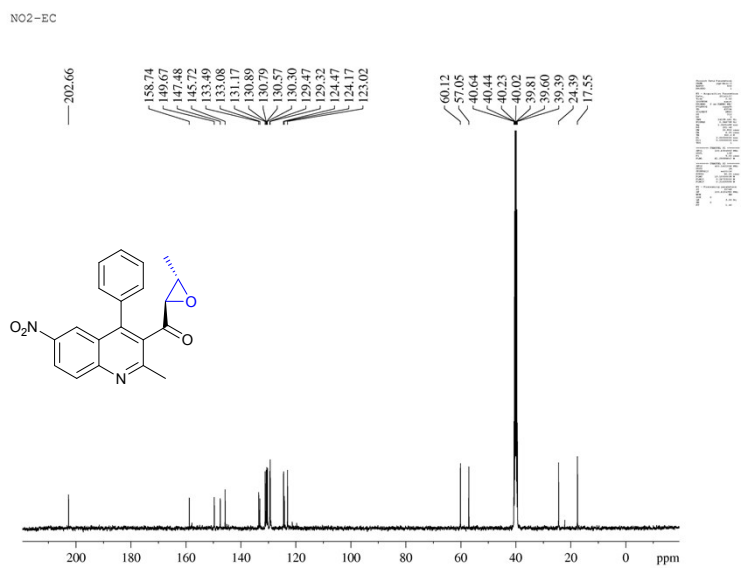

<sup>13</sup>C NMR Spectra of **2l** (100 MHz, DMSO-*d*<sub>6</sub>)

PQA-4F-E

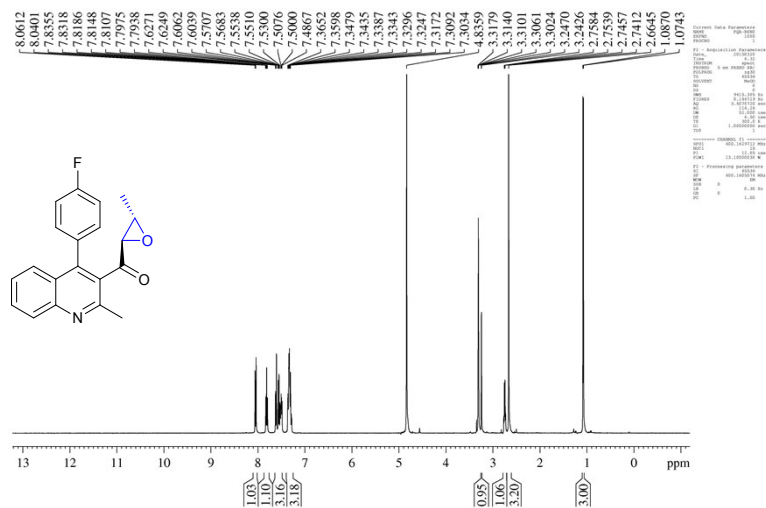

<sup>1</sup>H NMR Spectra of **2p** (400 MHz, CD<sub>3</sub>OD)

PQA-4F-E

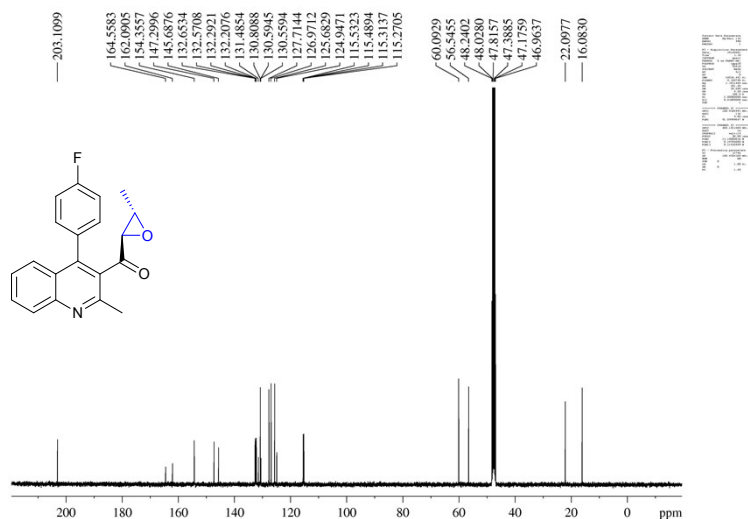

<sup>13</sup>C NMR Spectra of **2p** (100 MHz, CD<sub>3</sub>OD)

PQA-4Br

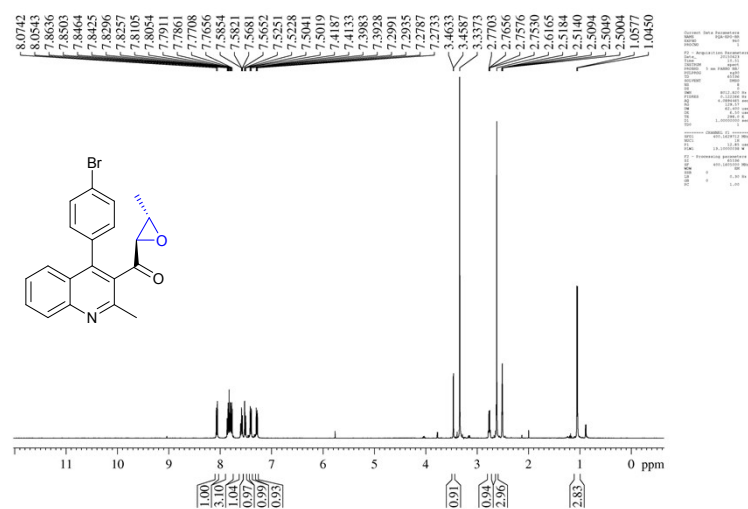

**<sup>1</sup>H NMR Spectra of 2q (400 MHz, DMSO-*d*<sub>6</sub>)**

PQA-4BR

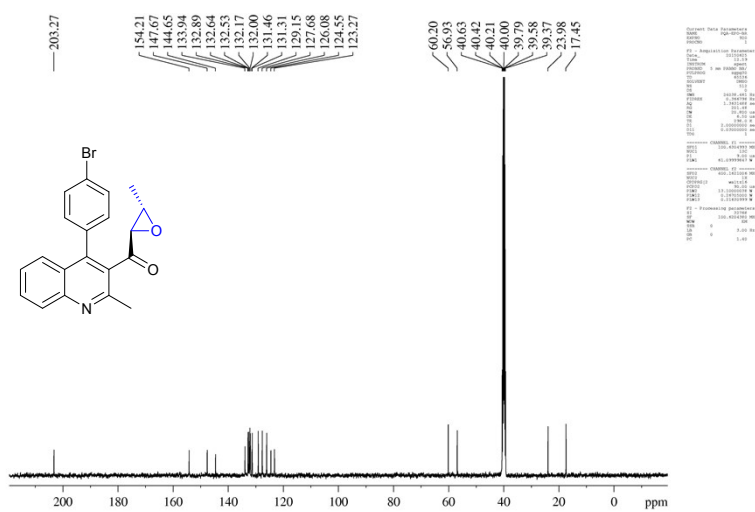

**<sup>13</sup>C NMR Spectra of 2q (100 MHz, DMSO-*d*<sub>6</sub>)**



Chemical structure of 2-(4-chlorophenyl)-2-methyl-1,2,3,4-tetrahydroquinolin-3-one:

Cc1c2ccccc2n(c1C(=O)OC3CC3)c4ccc(Cl)cc4

<sup>1</sup>H NMR spectrum (CDCl<sub>3</sub>) showing peaks from 0 to 8 ppm. The spectrum includes a multiplet for aromatic protons (7.2-7.7 ppm), a doublet for the methine proton (3.4 ppm), and a singlet for the methyl group (1.0 ppm). Integration values are provided below the baseline.

| Chemical Shift (ppm) | Integration                  |
|----------------------|------------------------------|
| 7.2-7.7 (multiplet)  | 1.06, 1.05, 1.05, 2.11, 1.00 |
| 3.4 (doublet)        | 1.13                         |
| 1.0 (singlet)        | 1.06, 3.16, 3.07             |

PQA-4CL-E

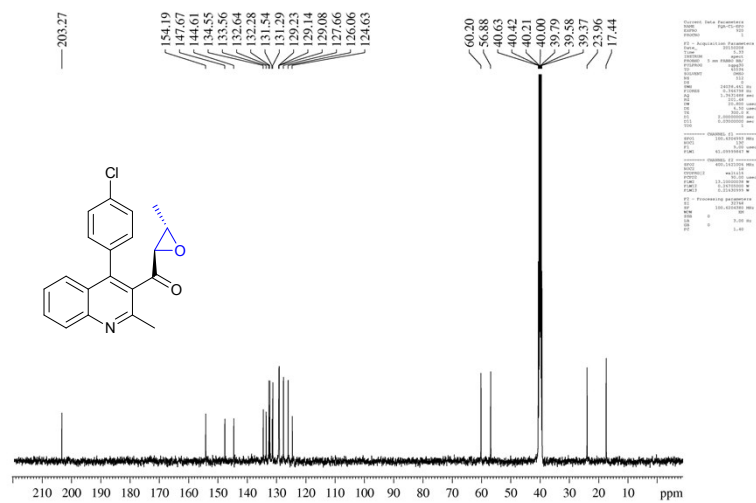

33

PQA-4OMe-E

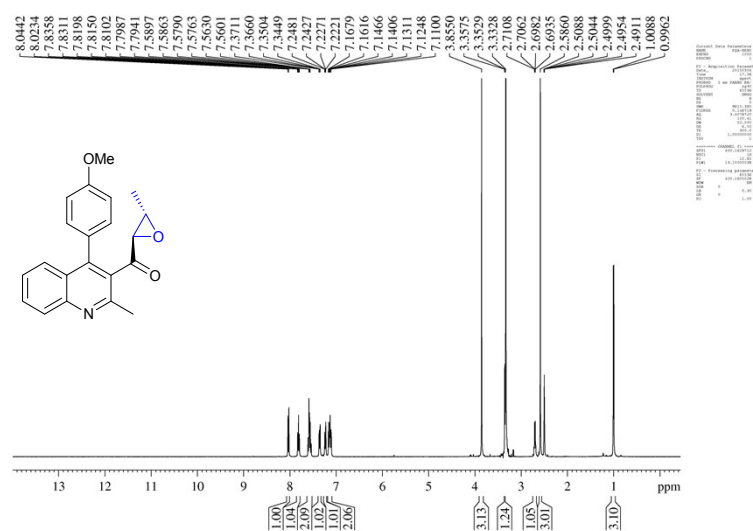

<sup>1</sup>H NMR Spectra of **2s** (400 MHz, DMSO-*d*<sub>6</sub>)

PQA-4OMe-E

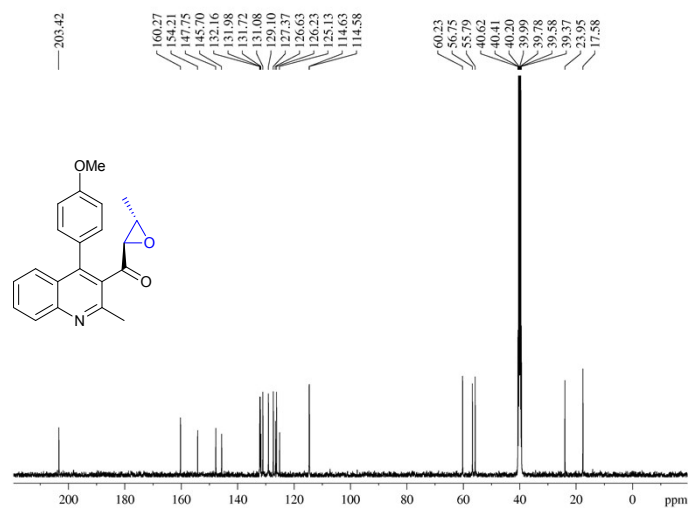

<sup>13</sup>C NMR Spectra of **2s** (100 MHz, DMSO-*d*<sub>6</sub>)

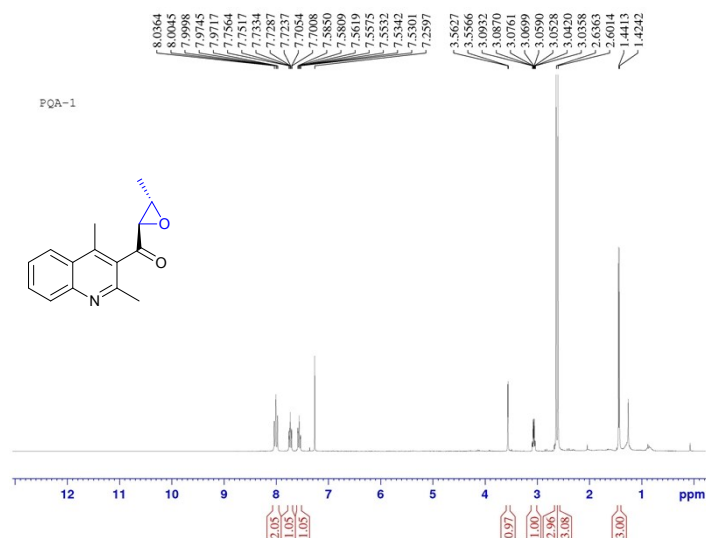

$^1\text{H}$  NMR Spectra of **2t** (300 MHz,  $\text{CDCl}_3$ )

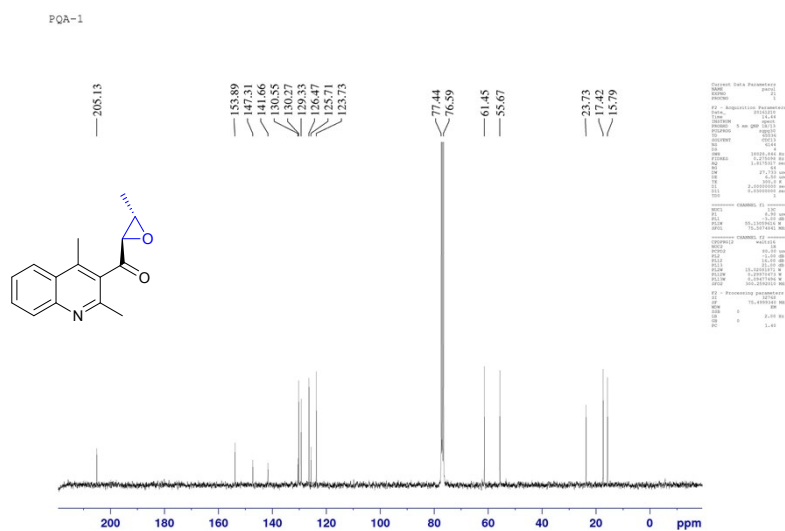

$^{13}\text{C}$  NMR Spectra of **2t** (75 MHz,  $\text{CDCl}_3$ )

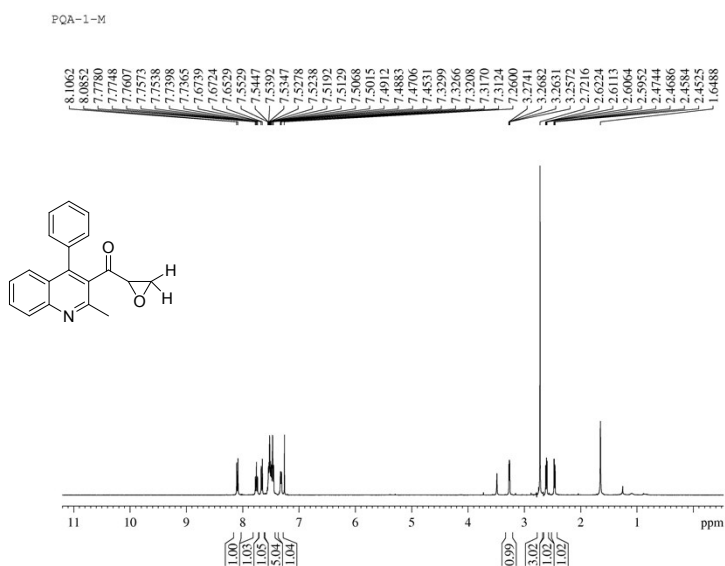

<sup>1</sup>H NMR Spectra of **2u** (400 MHz, CDCl<sub>3</sub>)

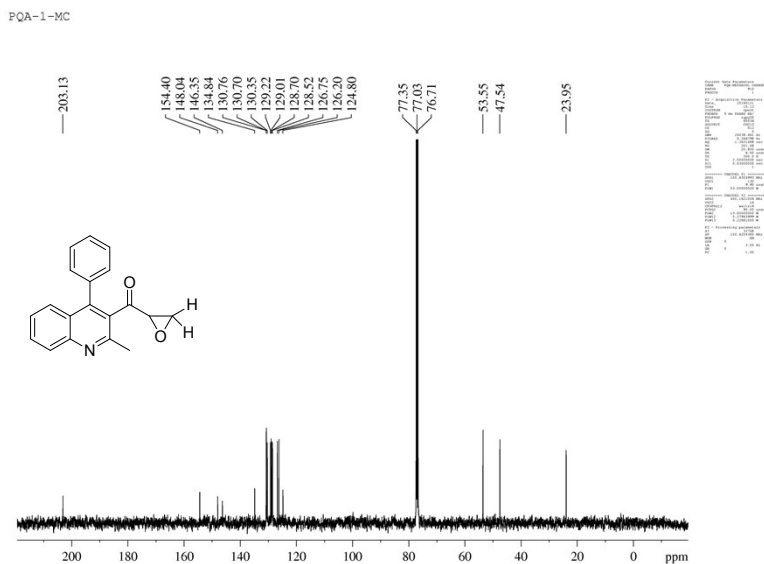

<sup>13</sup>C NMR Spectra of **2u** (100 MHz, CDCl<sub>3</sub>)

PQA 1 B

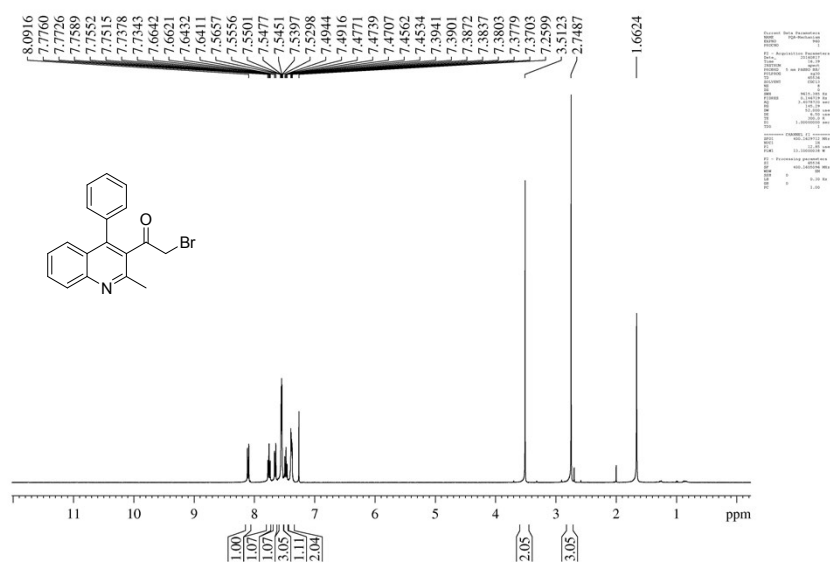

<sup>1</sup>H NMR Spectra of **3** (400 MHz, CDCl<sub>3</sub>)

PQA 1 BC

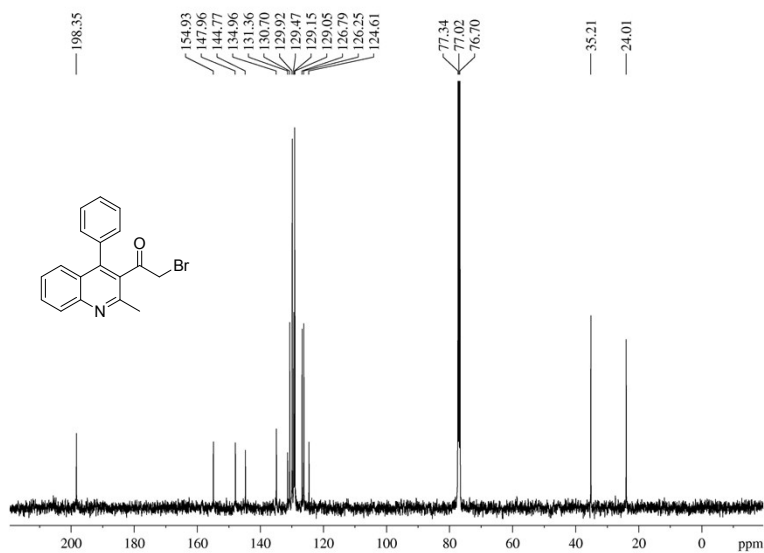

<sup>13</sup>C NMR Spectra of **3** (100 MHz, CDCl<sub>3</sub>)

PQA-1-CON

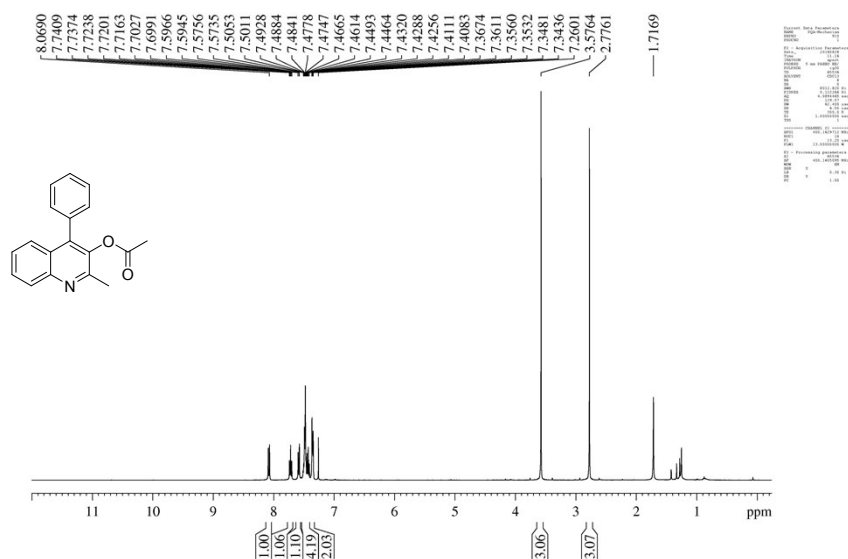

<sup>1</sup>H NMR Spectra of **4** (400 MHz, CDCl<sub>3</sub>)

PQA-1-CON

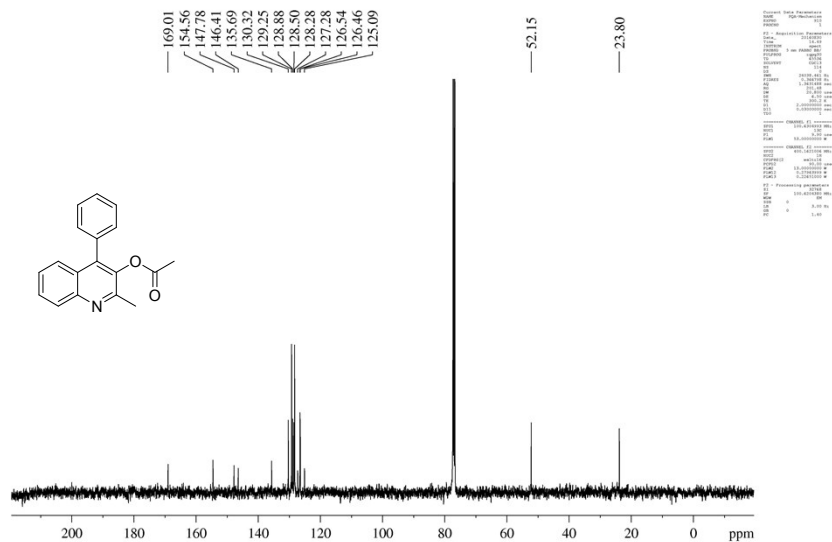

<sup>13</sup>C NMR Spectra of **4** (100 MHz, CDCl<sub>3</sub>)

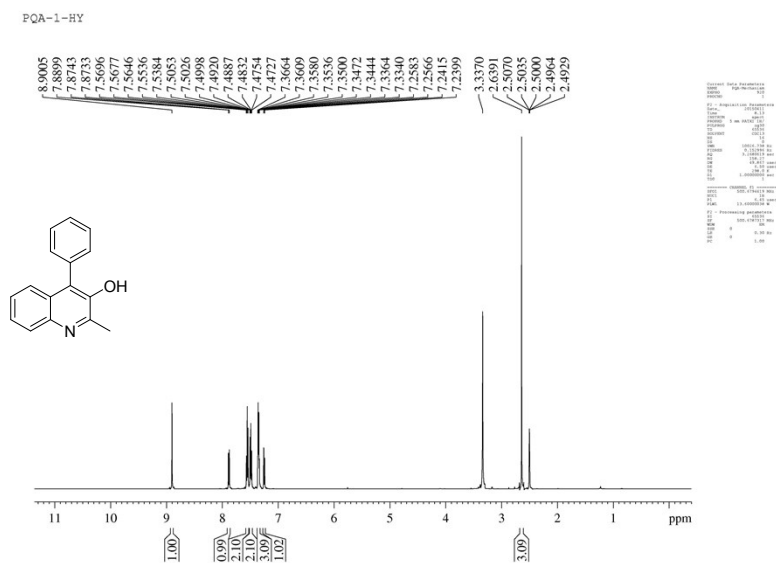

<sup>1</sup>H NMR Spectra of **5a** (500 MHz, DMSO-*d*<sub>6</sub>)

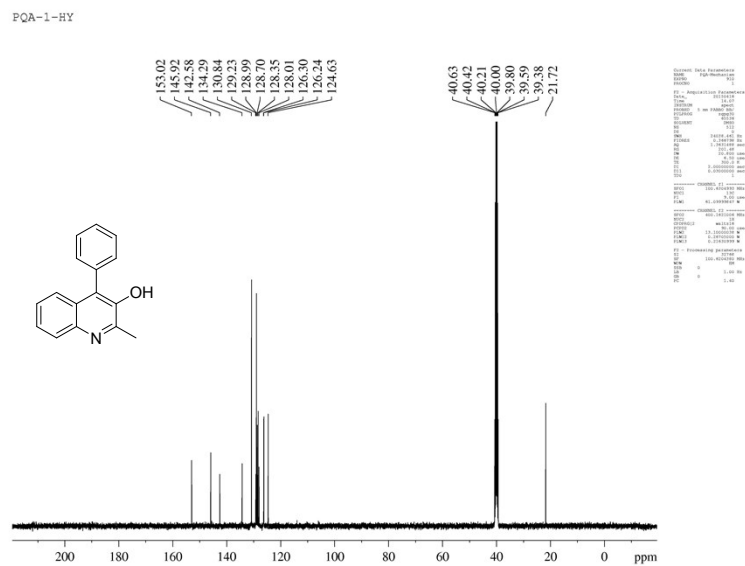

<sup>13</sup>C NMR Spectra of **5a** (100 MHz, DMSO-*d*<sub>6</sub>)

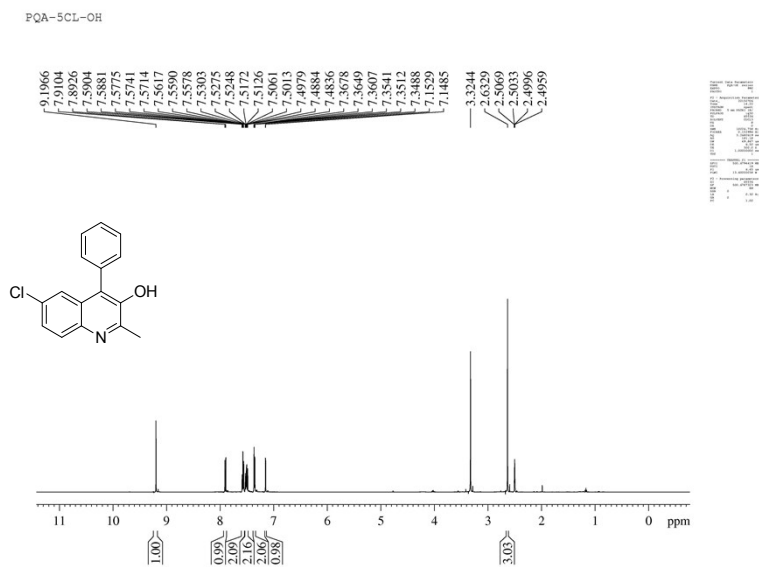

<sup>1</sup>H NMR Spectra of **5b** (500 MHz, DMSO-*d*<sub>6</sub>)

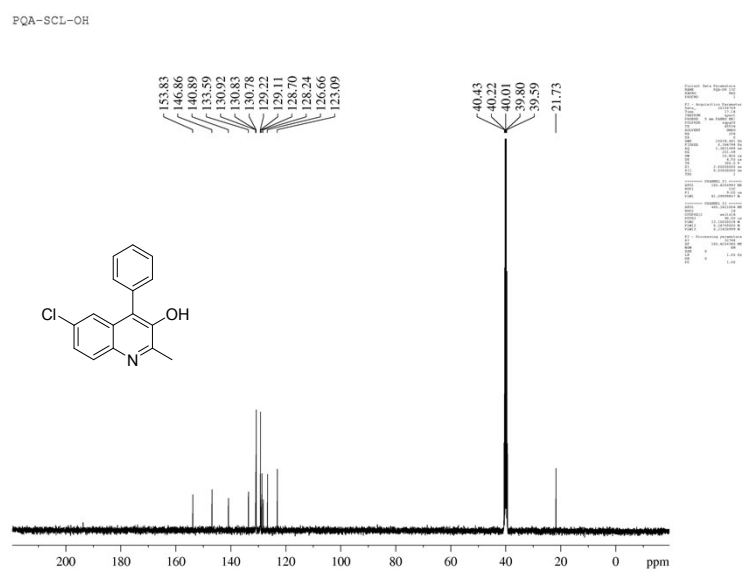

<sup>13</sup>C NMR Spectra of **5b** (100 MHz, DMSO-*d*<sub>6</sub>)



PQA-DICL-OH

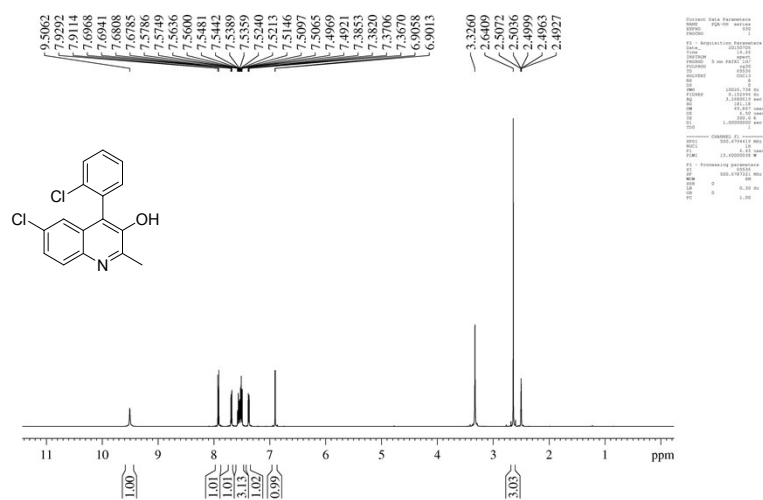

<sup>1</sup>H NMR Spectra of **5c** (500 MHz, DMSO-*d*<sub>6</sub>)

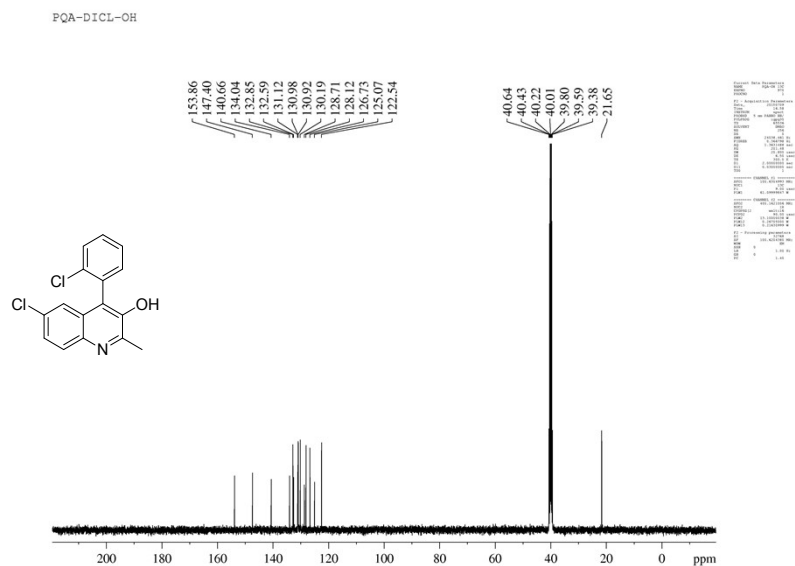

<sup>13</sup>C NMR Spectra of **5c** (100 MHz, DMSO-*d*<sub>6</sub>)

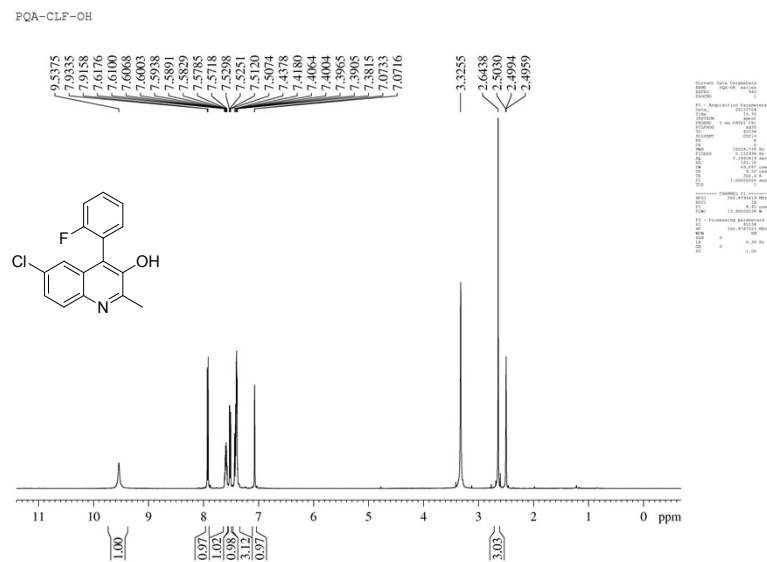

<sup>1</sup>H NMR Spectra of **5d** (500 MHz, DMSO-*d*<sub>6</sub>)

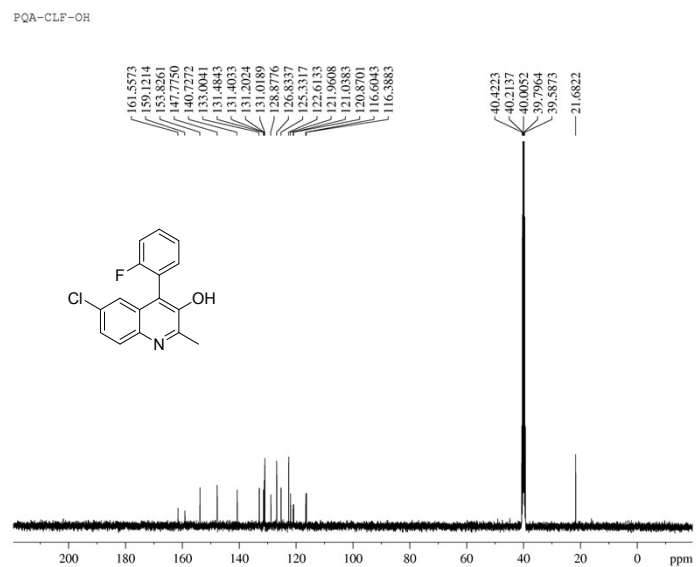

<sup>13</sup>C NMR Spectra of **5d** (100 MHz, DMSO-*d*<sub>6</sub>)

Chemical structure of 2-fluoro-4-(4-bromophenyl)-6-methyl-1H-benzimidazole-3-ol:

Cc1nc2cc(F)ccc2n1C3=CC=C(C=C3)Br

<sup>1</sup>H NMR spectrum (CDCl<sub>3</sub>) showing peaks (ppm) and integration values:

- 9.0686, 7.7516, 7.7318, 7.6472, 7.6412, 7.6366, 7.6349, 7.6201, 7.6140, 7.4907, 7.4771, 7.4708, 7.4571, 7.4502, 7.4367, 7.2842, 7.2565, 7.1597, 7.1484, 7.1313, 7.1289, 7.1189, 7.1166, 7.0995, 7.0971
- 3.3336, 2.6201, 2.5083, 2.5038, 2.4993, 2.4948

Integration values (from left to right): 1.00, 1.04, 2.11, 1.10, 2.15, 1.04, 3.10.

### <sup>1</sup>H NMR Spectra of **5e** (400 MHz, DMSO-*d*<sub>6</sub>)

Chemical structure of 2-methyl-6-fluoro-4-(4-bromophenyl)-1H-benzimidazole-3-carboxamide:

Cc1nc2cc(F)ccc2n1-c3ccc(Br)cc3C(=O)N

<sup>13</sup>C NMR spectrum (CDCl<sub>3</sub>) showing peaks (ppm):

| Peak (ppm) |
|------------|
| 158.5707   |
| 156.0511   |
| 153.9588   |
| 147.2496   |
| 143.8786   |
| 133.6433   |
| 132.1367   |
| 131.2563   |
| 128.1840   |
| 126.9975   |
| 125.2975   |
| 124.8026   |
| 121.3636   |
| 117.8208   |
| 117.7334   |
| 111.8032   |
| 111.5910   |
| 40.5649    |
| 40.3562    |
| 40.1472    |
| 39.9384    |
| 39.7297    |
| 39.5210    |
| 39.3118    |
| 39.1026    |
| 21.6179    |

Table of peak data:

| Peak (ppm) | Integration | Area (a.u.) | Area (%) |
|------------|-------------|-------------|----------|
| 158.5707   | 0.00        | 0.00        | 0.00     |
| 156.0511   | 0.00        | 0.00        | 0.00     |
| 153.9588   | 0.00        | 0.00        | 0.00     |
| 147.2496   | 0.00        | 0.00        | 0.00     |
| 143.8786   | 0.00        | 0.00        | 0.00     |
| 133.6433   | 0.00        | 0.00        | 0.00     |
| 132.1367   | 0.00        | 0.00        | 0.00     |
| 131.2563   | 0.00        | 0.00        | 0.00     |
| 128.1840   | 0.00        | 0.00        | 0.00     |
| 126.9975   | 0.00        | 0.00        | 0.00     |
| 125.2975   | 0.00        | 0.00        | 0.00     |
| 124.8026   | 0.00        | 0.00        | 0.00     |
| 121.3636   | 0.00        | 0.00        | 0.00     |
| 117.8208   | 0.00        | 0.00        | 0.00     |
| 117.7334   | 0.00        | 0.00        | 0.00     |
| 111.8032   | 0.00        | 0.00        | 0.00     |
| 111.5910   | 0.00        | 0.00        | 0.00     |
| 40.5649    | 0.00        | 0.00        | 0.00     |
| 40.3562    | 0.00        | 0.00        | 0.00     |
| 40.1472    | 0.00        | 0.00        | 0.00     |
| 39.9384    | 0.00        | 0.00        | 0.00     |
| 39.7297    | 0.00        | 0.00        | 0.00     |
| 39.5210    | 0.00        | 0.00        | 0.00     |
| 39.3118    | 0.00        | 0.00        | 0.00     |
| 39.1026    | 0.00        | 0.00        | 0.00     |
| 21.6179    | 0.00        | 0.00        | 0.00     |

<sup>13</sup>C NMR Spectra of **5e** (100 MHz, DMSO-*d*<sub>6</sub>)

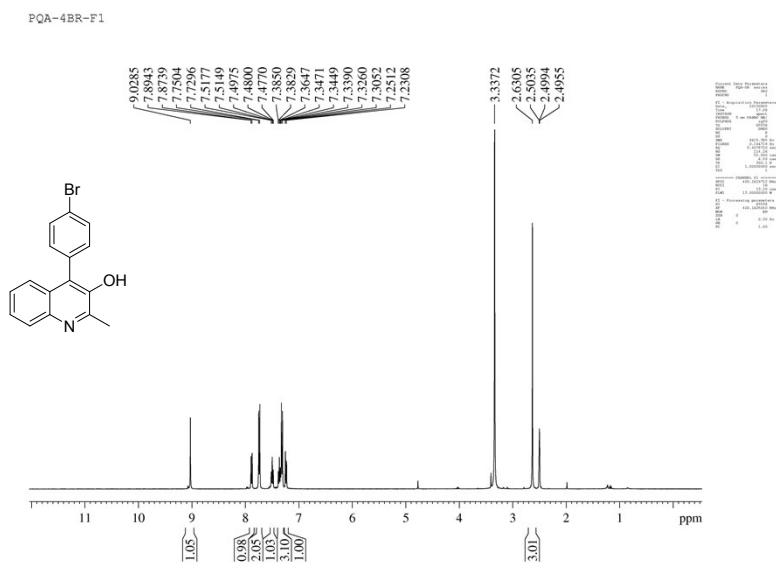

<sup>1</sup>H NMR Spectra of **5f** (400 MHz, DMSO-*d*<sub>6</sub>)

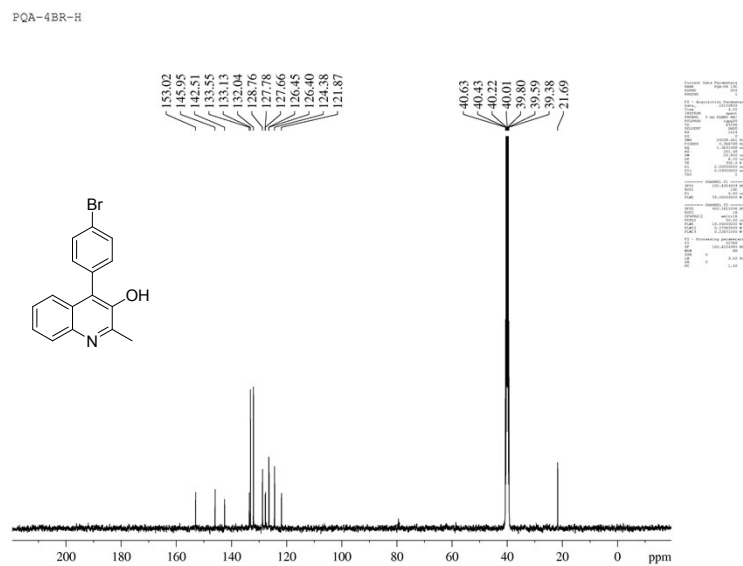

<sup>13</sup>C NMR Spectra of **5f** (100 MHz, DMSO-*d*<sub>6</sub>)

PQA-4CL-OH

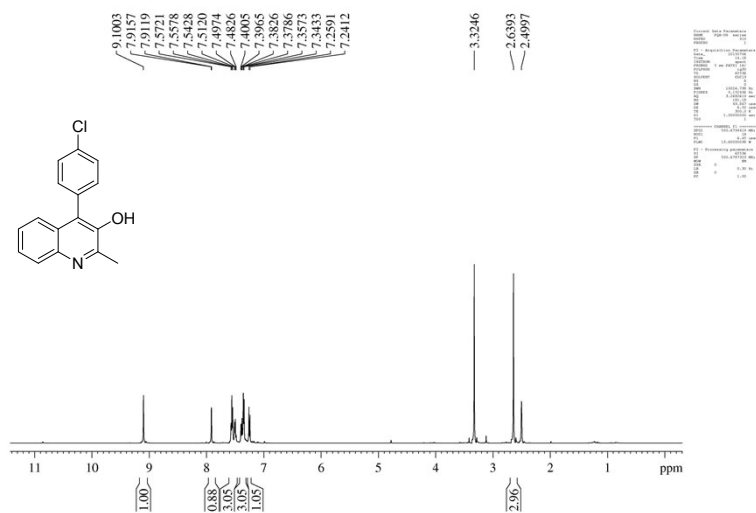

<sup>1</sup>H NMR Spectra of **5g** (500 MHz, DMSO-*d*<sub>6</sub>)

PQA-4CL-O-1

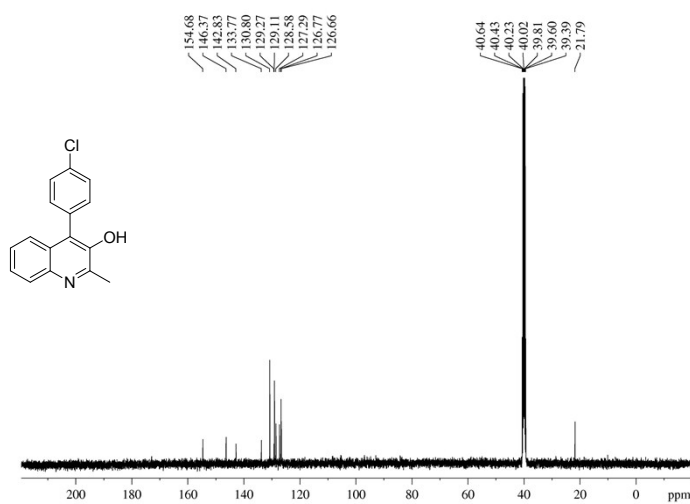

<sup>13</sup>C NMR Spectra of **5g** (100 MHz, DMSO-*d*<sub>6</sub>)

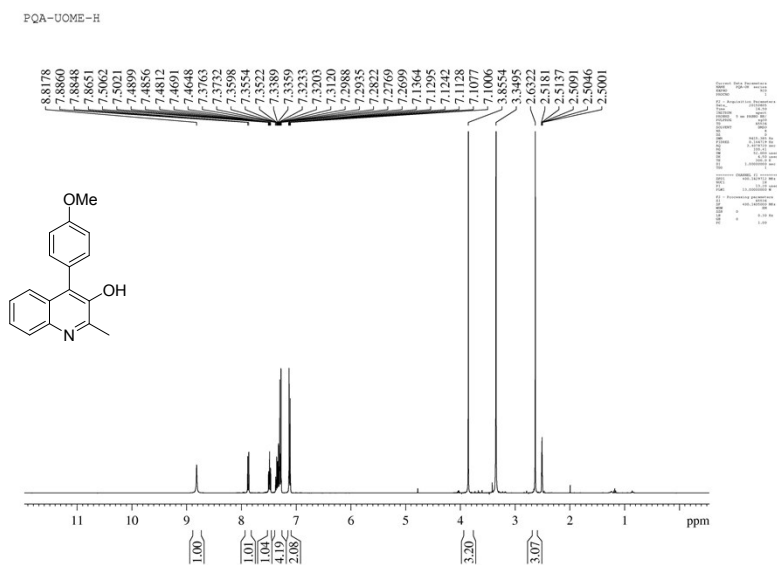

<sup>1</sup>H NMR Spectra of **5h** (400 MHz, DMSO-*d*<sub>6</sub>)

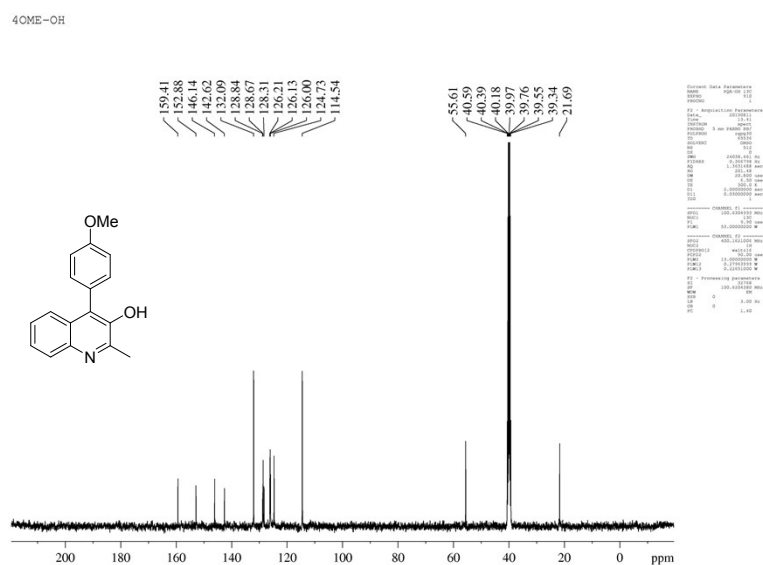

<sup>13</sup>C NMR Spectra of **5h** (100 MHz, DMSO-*d*<sub>6</sub>)
